# PGC-1 $\alpha$ isoforms coordinate to balance hepatic metabolism and apoptosis in inflammatory environments

Mélissa Léveillé<sup>1,2\*</sup>, Aurèle Besse-Patin<sup>1,2\*</sup>, Nathalie Jouvét<sup>1</sup>, Stewart Jeromson<sup>1,3</sup>, Naveen P. Khan<sup>1,3</sup>, Sarah Sczelecki<sup>1,3</sup>, Cindy Baldwin<sup>1</sup>, Annie Dumouchel<sup>1</sup>, Jorge Correia<sup>5</sup>, Paulo Jannig<sup>5</sup>, Stephanie K. Petrillo<sup>4</sup>, Anthoula Lazaris<sup>4</sup>, Jonathan Boulais<sup>1</sup>, Peter Metrakos<sup>4</sup>, Jorge L. Ruas<sup>5</sup> and Jennifer L. Estall<sup>1,2,3¶</sup>

\*denotes equal contribution

<sup>1</sup>Institut de recherches cliniques de Montreal (IRCM), Montreal, Quebec, Canada.

<sup>2</sup>Faculty of Medicine, University of Montreal, Montreal, Quebec, Canada.

<sup>3</sup>Division of Experimental Medicine, McGill University, Montreal, Quebec, Canada.

<sup>4</sup>Cancer Research Program, Department of Surgery, McGill University Health Center-Research Institute, Montreal, Quebec, H4A 3J1, Canada.

<sup>5</sup>Department of Physiology and Pharmacology, Karolinska Institutet, Stockholm, Sweden.

¶Corresponding author: Jennifer L. Estall, IRCM, 110 avenue des Pins Ouest, Montreal, Quebec, H2W 1R7 Canada. Phone: 514 987 5688, Email: [jennifer.estall@ircm.qc.ca](mailto:jennifer.estall@ircm.qc.ca)

Short title: PGC1A4 inhibits hepatocyte apoptosis

Figures: 6 figures, 7 SI Appendix figures

**Declaration of interests:** The authors have none to declare.

## 25 **ABSTRACT**

26 Liver is exposed to changing metabolic and inflammatory environments. It must sense and adapt  
 27 to metabolic need while balancing resources required to protect itself from insult. PGC-1 $\alpha$  is a  
 28 transcriptional coactivator that both coordinates metabolic adaptation to diverse stimuli and  
 29 protects against inflammation in several tissues. However, it is not known how PGC-1 $\alpha$  integrates  
 30 extracellular signals to balance metabolic and anti-inflammatory outcomes. PGC-1 $\alpha$  exists as  
 31 multiple, alternatively spliced variants expressed from different promoters. We show in human  
 32 liver, NALFD/NASH preferentially activated the alternative *PPARGC1A* promoter. Gene  
 33 expression analysis in primary mouse hepatocytes identified shared and isoform-specific roles  
 34 for PGC-1 $\alpha$  variants in response to TNF $\alpha$ . PGC-1 $\alpha$ 1 primarily impacted gene programs of nutrient  
 35 and mitochondrial metabolism, while TNF $\alpha$  signaling revealed that PGC-1 $\alpha$ 4 influenced several  
 36 pathways related to innate immunity and cell death. Gain- and loss-of-function models showed  
 37 that PGC-1 $\alpha$ 4 specifically enhanced expression of anti-apoptotic gene programs and attenuated  
 38 hepatocyte apoptosis in response to TNF $\alpha$  or LPS. This was in contrast to PGC-1 $\alpha$ 1, which  
 39 reduced expression of a wide inflammatory gene network, but did not prevent liver cell death.  
 40 We conclude that PGC-1 $\alpha$  variants have distinct, yet complimentary roles in hepatic responses to  
 41 inflammation and identify PGC-1 $\alpha$ 4 as an important mitigator of apoptosis.

42

43 Keywords: PGC-1 isoforms, *PPARGC1A*, cell death, inflammation, NASH, NAFLD, apoptosis, liver,  
 44 hepatic metabolism

45

46

47

48

## 49 INTRODUCTION

50 The liver is a vital organ with various physiological roles in metabolism, detoxification,  
 51 and innate immunity. Before entering the systemic circulation, blood enters the liver via the  
 52 portal vein and is filtered through the sinusoids. Thus, the liver is one of the first organs to  
 53 encounter absorbed nutrients as well as microbial products from the gastrointestinal tract, some  
 54 of which are toxins, antigens, and other metabolites that can cause inflammation. The unique  
 55 anatomical architecture of the liver allows it to perform a broad range of metabolic functions, but  
 56 at the same time it must exert powerful immunocompetence, surveilling portal blood and acting  
 57 as a protective barrier (Bogdanos, Gao, & Gershwin, 2013). The liver must adapt quickly to  
 58 various metabolic and inflammatory signals from the digestive tract or systemic circulation,  
 59 concurrently responding to changing glucose and lipid homeostasis, while integrating  
 60 inflammatory signals, and if needed, initiating an immune response. Importantly, hepatic  
 61 metabolism can be reprogramed by an inflammatory response (Ganeshan et al., 2019), allowing a  
 62 trade-off between energy destined for nutrient metabolism versus tolerance to infection.  
 63 However, mechanisms helping to balance metabolic demand with inflammatory response are not  
 64 clear.

65 The peroxisome proliferator activated receptor gamma coactivator-1 alpha (PGC-1 $\alpha$ )  
 66 regulates many transcriptional programs related to nutrient metabolism, energy homeostasis  
 67 and mitochondrial respiration (Wu et al., 1999) by binding to nuclear receptors and other  
 68 transcription factors to enhance their activity (Kelly & Scarpulla, 2004). PGC-1 $\alpha$  is important for  
 69 mitochondrial homeostasis in several tissues, but also activates expression of gene programs  
 70 within a broader set of biological functions. For example, PGC-1 $\alpha$  is induced in skeletal muscle  
 71 during exercise and stimulates expression of genes involved in fiber type switching, angiogenesis  
 72 and regulation of the neuromuscular junction (Arany et al., 2008; Baar et al., 2002; Handschin et

al., 2007; Lin et al., 2002). In liver, PGC-1 $\alpha$  is induced during fasting and to increase gluconeogenesis, heme biosynthesis, modulate insulin response and enhance fatty acid oxidation (Besse-Patin et al., 2019; Estall, Kahn, et al., 2009; Estall, Ruas, et al., 2009; Yoon et al., 2001).

Evidence suggests that PGC-1 $\alpha$  is also an essential component of the inflammatory response, but mechanisms for this are unclear. Over-expression in muscle protects mice from disease, exercise, and age-related inflammatory damage (Chan et al., 2014; Dinulovic et al., 2016; Eisele, Furrer, Beer, & Handschin, 2015; Eisele, Salatino, Sobek, Hottiger, & Handschin, 2013) and preservation of PGC-1 $\alpha$  activity blunts lipopolysaccharide (LPS)-induced inflammatory damage to heart and kidney (Schilling et al., 2011; Tran et al., 2011). On the other hand, reduced PGC-1 $\alpha$  increases pro-inflammatory cytokine expression and increases inflammation damage to muscle and liver tissue in response to stresses (Besse-Patin et al., 2017; Eisele et al., 2015; Szelecki et al., 2014). Over-expression of PGC-1 $\alpha$  decreases expression of pro-inflammatory cytokines, while simultaneously inducing expression of secreted anti-inflammatory factors (Buler et al., 2012; Eisele et al., 2015) that can feed back to dampen inflammatory signaling. How PGC-1 $\alpha$  regulates the inflammatory response within cells is not yet understood.

Although PGC-1 $\alpha$  is a coactivator, data suggest that PGC-1 $\alpha$  may indirectly represses NF- $\kappa$ B target gene transcription through coactivation of anti-inflammatory transcriptional networks linked to PPARs (Eisele et al., 2013). It may also bind to the p65 subunit of nuclear factor kappa-light-chain-enhancer of activated B cells (NF- $\kappa$ B) (Alvarez-Guardia et al., 2010), but it is unclear whether this leads to direct repression of its activity. Thus, mechanistic understanding of links between inflammatory signaling and PGC-1 $\alpha$  activity remain limited and likely goes beyond regulation of NF- $\kappa$ B. Data support PGC-1 $\alpha$  as an important regulator of both mitochondria metabolism and inflammation, yet it is not known how PGC-1 $\alpha$  integrates multiple extra-cellular signals to coordinate and balance each cellular response. In this study, we show that differentially



spliced variants of the PGC-1 $\alpha$  protein have unique functions in regulating hepatocyte responses to concurrently integrate metabolic and inflammatory signals.

## MATERIALS AND METHODS:

### *Mice*

Mice with a floxed *Ppargc1a* allele (B6.129-*Ppargc1a*<sup>tm2.1Brsp/J</sup>) were crossed with mice expressing Cre-recombinase under control of the albumin promoter Tg(Alb-cre)<sup>21Mgn/J</sup>. Interbred mice created hepatocyte-specific PGC-1 $\alpha$  knockout mice (LKO: *Ppargc1a*<sup>fl/fl, Alb-cre</sup>) and littermate controls (WT: *Ppargc1a*<sup>fl/fl</sup> and Alb-Cre+). Age-matched, male mice on a C57BL/6J background were used. For tissue-specific PGC-1 $\alpha$ 4 over-expression (<sup>LSL</sup>PGC-1 $\alpha$ 4), tdTomato was replaced with murine PGC-1 $\alpha$ 4 cDNA in the Ai9 vector downstream of the Lox-stop-Lox signal (Supplemental Fig. S1). Recombination at the *ROSA26* locus was confirmed in neomycin-resistant C57BL/6 embryonic stem cells clones and founder mice backcrossed 10 generations onto a C57BL/6N background. Genotyping primers are listed in Supplemental Table S1.

The *Ppargc1a* Alternative Promoter Knock-out mouse line (AltPromKO) was generated by InGenious Targeting Laboratory (Ronkonkoma, New York). Briefly, a targeting construct was used to insert LoxP sites flanking exon 1b and 1b' of the alternative *Ppargc1a* promoter (Supplemental Fig. S1). Recombination was confirmed in C57BL/6 embryonic stem cells and founder mice backcrossed three times with C57BL/6N mice. Experiments were performed in accordance with IRCM institutional animal care and use committee regulations.

### *Mouse housing, diets, and lipopolysaccharide treatment*

Mice were maintained on *ad libitum* chow (Tekland #2918) at 22°C (12h light/dark cycle). For *in vivo* model of steatohepatitis, mice were fed a methionine-choline deficient (MCD) diet

121 (A02082002B, Research Diets) or matched control diet (A02082003B) starting at 8 weeks of age  
122 for up to 42 days. Serum alanine aminotransferase (ALT) was measured by Liquid ALT (SGPT) kit  
123 (Pointe Scientific). For LPS treatment, livers of 10-week-old male or female mice were harvested  
124 6 hours after tail-vein injection of LPS (2 mg/kg, Invivogen) or vehicle (PBS).

125

#### 126 *Primary hepatocyte isolation and treatment*

127 Primary mouse hepatocytes from 12-week-old mice were isolated by two-step liberase perfusion  
128 (Liberase TL, Roche) and 50% Percoll gradient purification (Besse-Patin et al., 2017). Cells were  
129 cultured in Dulbecco's modified Eagle's medium (DMEM) supplemented with 0.2% BSA (Fatty  
130 acid free, Fisher Scientific), 25 mM glucose, 2 mM sodium pyruvate, 0.1  $\mu$ M dexamethasone, 1%  
131 Penicillin/Streptomycin and 1 nM insulin. One day after isolation, hepatocytes were infected with  
132 adenovirus (5 MOI) overnight and starved of insulin and dexamethasone for 24 hours prior to  
133 treatment with TNF $\alpha$  (Fitzgerald) at 2 ng/mL for 2 hours for signaling/gene expression, or 20  
134 ng/mL for 8 hours for apoptosis. Apoptosis was measured by Cell Death Detection ELISA (Roche).  
135 For reporter assays, cells were transfected (Lipofectamine) with a construct expressing firefly  
136 luciferase downstream of 3x NF- $\kappa$ B response elements. Activity was normalized to total protein  
137 following quantification using the Dual Luciferase Reporter Assay System (Promega).

138

#### 139 *Protein isolation, immunoprecipitation and immunoblotting*

140 Proteins were homogenized/solubilized in radioimmunoprecipitation assay buffer containing  
141 protease and phosphatase inhibitors. Hepatic PGC-1 $\alpha$  was immunoprecipitated from liver using  
142 anti-PGC-1 $\alpha$  (Millipore, ST1202) in 1% Triton/TBS. Elutes and total proteins were resolved by  
143 SDS-PAGE, blotted, and probed with antibodies (Supplemental [Table S2](#)).

144

## 145 *Immunofluorescence*

146 H2.35 cells cultured in DMEM, supplemented with 10% Fetal Bovine Serum (FBS, Wisent), 1%  
147 penicillin/streptomycin, 0.2  $\mu$ M dexamethasone were incubated on poly-L-lysine coated  
148 coverslips and transfected with V5-tagged PGC-1 $\alpha$  variants for 24 hours (Lipofectamine). Cells  
149 were starved overnight of dexamethasone prior to TNF $\alpha$  treatment (50 ng/ml) for 3 hours and  
150 fixation with 4% paraformaldehyde. Triton-permeabilized cells were incubated with anti-V5  
151 antibody overnight, followed by Alexa 488-conjugated secondary antibody to visualize proteins.

## 153 *Cell fractionation*

154 H2.35 cells transduced with adenovirus expressing control vector, PGC-1 $\alpha$ 1 or PGC-1 $\alpha$ 4 were  
155 starved overnight of dexamethasone prior to TNF $\alpha$  treatment (50 ng/ml) for 3 hours. Cell pellets  
156 were washed in PBS and resuspended in Lysis Buffer (10 mM Hepes (pH 7.5), 10 mM KCl, 3 mM  
157 MgCl<sub>2</sub>, 0.35 M sucrose, 0.1% NP40, 3 mM 2-mercaptoethanol, 0.4 mM PMSF, 1  $\mu$ M pepstatin A, 1  
158  $\mu$ M leupeptin and 5  $\mu$ g/ml aprotinin). After centrifugation, supernatants were kept as  
159 cytoplasmic fraction. The pellet (nuclear fraction) was washed twice with lysis buffer,  
160 resuspended in Buffer A (3 mM EDTA, 0.2 mM EGTA, 1 mM dithiothreitol, 100 mM NaCl and 0.8%  
161 NP40) and sonicated for 10 minutes (cycles of 30 seconds ON and 30 seconds OFF). Equal  
162 amount of proteins were resolved by SDS-PAGE.

## 164 *Microarray and Gene set enrichment analysis*

165 mRNA was isolated from primary mouse hepatocytes infected with adenovirus expressing PGC-  
166 1 $\alpha$ 1, PGC-1 $\alpha$ 4 or vector control treated with 2 ng/mL TNF $\alpha$  or vehicle (PBS) for 2 hours (n = 3)  
167 and gene expression profiles generated using Affymetrix Mouse Genome 430 2.0 Arrays. Raw CEL

168 files were normalized using RMA [PMID: 12925520] and annotated using biomaRt [PMID:  
169 16082012]. Raw data and sample annotation are available on GEO ([GSE132458](#)).

170 Gene set enrichment analysis was performed using javaGSEA software (version 3.0 –  
171 build: 01600) on chip data using the Gene Ontology processes (number of permutations = 1000,  
172 Permutation type = gene\_set, Chip platform = Affy\_430\_2.0\_mgi (version 2011) from the Mouse  
173 Genome Database. The *Ppargc1a* probe (1434099\_at) was removed prior to analysis to eliminate  
174 over-expression bias. Full GSEA results are provided in [Supplemental File 1](#). A MySQL database  
175 generated lists of genes significantly regulated (adj. p-value < 0.01, Log10 FC ≥ 0.3 or ≤ -0.3). Full  
176 lists are provided in [Supplemental Files 2](#) (untreated samples) and [3](#) (TNFα-treated samples).

177 Clustering based on PGC-1α4-regulated genes was performed using dChip software. Over-  
178 representation analysis (ORA) of Gene Ontology processes was performed using ClusterProfiler  
179 and the mouse genome-wide annotation in R ([www.r-project.org](http://www.r-project.org)). The top 10 statistically over-  
180 represented processes were determined for each condition, merged in to one list, and  
181 represented as a dot plot (adj. p-value < 0.05, correction method = Bonferroni). For 175 genes  
182 regulated oppositely by the variants, ORA was performed using g:Profiler (adj. p-value < 0.05,  
183 correction method = g:SCS threshold). Gene lists were evaluated for enrichment of transcription  
184 factor signatures and binding sites in the proximal promoters and distant regulatory elements  
185 using iRegulon and DiRE (<http://dire.code.org>) with default analysis settings.

186

187 *RNA isolation, PCR, and quantitative RT-PCR.*

188 RNA was isolated from frozen tissue or cells using TRIzol (Invitrogen). 1 µg of RNA treated with  
189 DNase I was reverse-transcribed using the High Capacity Reverse Transcription Kit (Applied  
190 Biosystems). cDNA was quantified using SYBR Green PCR master mix (Bioline) and normalized to  
191 Hypoxanthine-guanine phosphoribosyltransferase (*Hprt*) mRNA using the  $\Delta\Delta C_t$  threshold cycle

192 method. Presence or absence of PGC-1 $\alpha$  variants was confirmed using isoform-specific primers  
193 by conventional PCR and sequencing (Supplemental [Table S3](#)).

194

#### 195 *Patients and liver samples*

196 Human liver samples were collected from 38 subjects age 33-81 years (Low 3 M: 4 W, NAFLD 10  
197 M: 4 W, NASH 6 M: 3 W, Cirrhotic 4 M: 4 W) undergoing hepatic resection at the McGill University  
198 Health Centre after informed consent obtained. Samples were snap-frozen and stored at -80°C.  
199 Specimens were scored by a pathologist and classified based on NAFLD Activity Score (NAS: Low  
200 = $\leq$ 2, NAFLD =3-5, NASH =6-9, Cirrhotic =7-9) and fibrosis staging from 1A to 3. Study protocol  
201 was approved by the Research Ethics Boards of McGill and the Institut de Recherches Cliniques  
202 de Montréal (IRCM). M= men W= women.

203

#### 204 *Statistical analysis*

205 Normal distribution and homoscedasticity of data were tested by Shapiro–Wilks and Bartlett  
206 tests, respectively. Parametric tests were used if distributions normal and variances equal. One-  
207 way or Two-way analysis of variance were followed by Tukey’s (one-way) or Dunnett’s multiple  
208 comparisons (two-way) post-hoc test.using GraphPad Prism software. Data are expressed as  
209 mean  $\pm$  SEM unless otherwise indicated.

210

## 211 **RESULTS**

212

### 213 ***Loss of hepatic PGC-1 $\alpha$ results in increased inflammatory damage to liver***

214 Over-expression of PGC-1 $\alpha$  inhibits NF- $\kappa$ B and increases anti-inflammatory cytokines  
215 (Buler et al., 2012; Eisele et al., 2013; Rao et al., 2014). Consistently, low PGC-1 $\alpha$  increases  
216 hepatic inflammatory signaling in a mouse model of obesity and fatty liver disease (Besse-Patin

et al., 2017), but it is not known whether altered PGC-1 $\alpha$  expression influences inflammatory liver damage. To investigate this, we subjected male mice with hepatocyte-specific deletion of the *Ppargc1a* (PGC-1 $\alpha$ ) gene (LKO mice) to 6-weeks of a methionine-choline-deficient (MCD) diet, a murine model of inflammatory steatohepatitis. LKO mice had higher circulating levels of alanine aminotransferase (ALT) 42 days after initiation of the diet compared to sex- and age-matched littermate wild-type (WT) controls ([Fig 1A](#)), suggesting that loss of hepatic PGC-1 $\alpha$  aggravates liver damage within a setting of steatosis and inflammation.

### ***PGC-1 $\alpha$ 1 and PGC-1 $\alpha$ 4 are expressed in inflamed liver***

We next investigated whether hepatic PGC-1 $\alpha$  expression associated with liver inflammation. PGC-1 $\alpha$  proteins at molecular weights (MW) of ~110 kDa and ~37 kDa were immunoprecipitated at higher levels from mouse liver tissue fifteen days after initiation of the MCD diet compared to control diet-fed mice ([Fig 1B](#)), concurrent with an increase in inflammatory markers ([Fig 1C](#)). Multiple splice variants of PGC-1 $\alpha$  have been identified that are transcribed from proximal or alternative promoters (Felder et al., 2011; Miura, Kai, Kamei, & Ezaki, 2008; Ruas et al., 2012; Yoshioka et al., 2009; Zhang et al., 2009). Since some of these isoforms have biological activity distinct from canonical PGC-1 $\alpha$  (herein called PGC-1 $\alpha$ 1) (Martinez-Redondo, Pettersson, & Ruas, 2015), we sought to identify which variants were impacted in inflamed liver. In healthy fed mice, only *Pgc-1 $\alpha$ 1* transcripts are detected at appreciable levels in liver (Ruas et al., 2012). Since expression of alternative PGC-1 $\alpha$  isoforms is often stimulus- and context-dependent (Chinsomboon et al., 2009; Norrbom et al., 2011; Popov, Bachinin, Lysenko, Miller, & Vinogradova, 2014; Tadaishi, Miura, Kai, Kawasaki, et al., 2011; Thom, Rowe, Jang, Safdar, & Arany, 2014; Wen et al., 2014; Ydfors et al., 2013) and qPCR cannot discern between certain variants, we first used variant-specific PCR (Martinez-Redondo et al.,

2015) to explore which are expressed in mouse hepatocytes treated or not with forskolin (to induce both proximal and alternative promoters). In untreated primary hepatocytes, we detected few transcripts for any variant. Forskolin induced expression of *Pgc-1 $\alpha$ 1* and *NT-Pgc-1 $\alpha$ -a* from the proximal promoter, and *Pgc-1 $\alpha$ -b* and *Pgc-1 $\alpha$ 4* from the alternative promoter (Supplemental Fig. S2).

Consistent with protein levels (Fig 1B), transcripts for *Pgc-1 $\alpha$ 1* and *Pgc-1 $\alpha$ 4* were increased in wild-type mouse livers after initiation of MCD diet and concurrent with increased inflammatory markers (Fig 1D). Interestingly, only transcripts from the alternative promoter (containing exons 1b and 1b') were increased in liver samples of human subjects with biopsy-confirmed inflammatory liver disease (i.e. NAFLD, NASH or cirrhosis) compared to livers with simple steatosis (low) (Supplemental Fig. S3). Of these, we found *PGC-1 $\alpha$ 4* transcript levels increased proportionally with the severity of inflammatory liver disease, with significantly higher mRNA levels detected in cirrhotic liver (Fig 1E). In contrast, transcripts from the proximal promoter trended downward in human samples (Supplemental Fig. S3, Fig 1E). Taken together, our data suggest that inflammation differentially regulates PGC-1 $\alpha$  variant expression and that the alternative *PPARGC1A* promoter is activated in hepatic inflammatory disease, leading to increased PGC-1 $\alpha$ 4.

### ***PGC-1 $\alpha$ 1 and PGC-1 $\alpha$ 4 have distinct roles in the hepatic response to TNF $\alpha$***

Since PGC-1 $\alpha$  isoforms can have overlapping and distinct biological activity (Martinez-Redondo et al., 2015), we sought to determine whether PGC-1 $\alpha$ 1 and PGC-1 $\alpha$ 4 influence inflammatory signaling pathways. We first compared the transcriptome of primary mouse hepatocytes by microarray following over-expression of PGC-1 $\alpha$ 1, PGC-1 $\alpha$ 4, or vector alone in the absence or presence of the inflammatory cytokine, tumor necrosis factor (TNF $\alpha$ ) (GEO#:TBD)



(Supplemental Fig. S4). More than 1000 genes changed by  $\geq 2$ -fold following PGC-1 $\alpha$ 1 over-expression compared to vector alone ( $p < 0.05$ ,  $FDR < 0.01$ ), while only 24 were changed by PGC-1 $\alpha$ 4 and only 4 genes overlapped between the two lists (Fig 2A, Supplemental File 1). Following TNF $\alpha$  treatment, >4500 genes were changed  $\geq 2$ -fold in hepatocytes over-expressing PGC-1 $\alpha$ 1 and >3000 for PGC-1 $\alpha$ 4, with 36% of the genes shared between isoforms (Fig 2A, Supplemental File 2). Clustering of PGC-1 $\alpha$ 4-modulated genes and comparison to levels in vector- or PGC-1 $\alpha$ 1-expressing hepatocytes suggested that the activity of PGC-1 $\alpha$ 4 relied heavily on the presence of TNF $\alpha$  (Fig 2B). Furthermore, within this inflammatory context, PGC-1 $\alpha$ 4 had both over-lapping and distinct activity from PGC-1 $\alpha$ 1. Of the 2051 genes shared by the variants in TNF $\alpha$ -treated cells, the majority (91.5%) were regulated in the same manner (positively or negatively, Supplemental File 2).

To gain a global impression of biological process regulated by the PGC-1 $\alpha$  variants in hepatocytes, we performed gene set enrichment analysis (GSEA). Gene sets relating to mitochondrial respiration and substrate metabolism were enriched by both PGC-1 $\alpha$ 1 and PGC-1 $\alpha$ 4 ( $FDR$  q-value  $< 0.1$ ). PGC-1 $\alpha$ 1 predominantly regulated mitochondrial respiration, and glucose, amino acid and fatty acid metabolism, regardless of TNF $\alpha$  treatment (Supplemental File 3). This is consistent with known roles of PGC-1 $\alpha$ 1 on mitochondrial metabolism and supported by qPCR (Supplemental Fig. S5). Although we saw no effect of PGC-1 $\alpha$ 4 on these PGC-1 $\alpha$ 1 target genes, PGC-1 $\alpha$ 1 and PGC-1 $\alpha$ 4 shared many overlapping gene sets (Supplemental File 3). GSEA for PGC-1 $\alpha$ 4 in untreated hepatocytes centered on lipid metabolism (fatty acids and triglycerides), sterol metabolism and mitochondrial respiration, but individual gene effects were mild and most did not reach the 2-fold cut-off. However, when TNF $\alpha$  was present, PGC-1 $\alpha$ 4-enriched pathways included regulation of transcription factor transport to the nucleus, innate immunity, responses to interferon/PAMP, TLR signaling, acute inflammation, and apoptosis. Overall, TNF $\alpha$  signaling



revealed isoform-specific responses and highlighted processes related to the innate immune response and cell death unique to PGC-1 $\alpha$ 4.

To explore differential effects of the isoforms on inflammation, we performed gene ontology (GO) analysis on gene changes occurring only in the presence of TNF $\alpha$ . Top 10 GO pathways unique to each variant, or shared, are shown in Fig 2C. All of the top PGC-1 $\alpha$ 1-regulated processes focused on energy metabolism and were shared with PGC-1 $\alpha$ 4. However, 6 of the top pathways for PGC-1 $\alpha$ 4 were unique to this variant, including 6-carbon sugar metabolism, proteolysis, immune signaling in response to pathogens, and regulation of cell death (Fig 2C). Interestingly, GO terms associated with the 175 shared genes regulated in an opposite manner by the variants (Supplemental File 4) centered mainly on cell death and apoptosis (Fig 2D). These data suggest that apoptosis is an important effector pathway *differentially* regulated by these two PGC-1 $\alpha$  protein variants.

### ***TNF $\alpha$ signaling influences localization of PGC-1 $\alpha$ 4 within liver cells***

TNF $\alpha$  treatment substantially increased the number of PGC-1 $\alpha$ 4 gene targets, revealing that external signals such as inflammation might be necessary for PGC-1 $\alpha$ 4 activity. Over-expressed PGC-1 $\alpha$ 4 localized primarily to the cytoplasm of H2.35 liver cells; therefore, nuclear exclusion might explain why increased PGC-1 $\alpha$ 4 has little effect on basal gene expression in untreated hepatocytes (Fig 2A). Following addition of TNF $\alpha$  to media, a significant proportion of PGC-1 $\alpha$ 4 was observed in the perinuclear and nuclear compartments (Fig 3A). Cell fractionation confirmed that PGC-1 $\alpha$ 4 protein was only detected in the nuclear pellet following TNF $\alpha$  treatment (Fig 3B). In contrast, PGC-1 $\alpha$ 1 localized exclusively to the nucleus of liver cells regardless of treatment condition (Fig 3A). Total levels of both PGC-1 $\alpha$ 1 and PGC-1 $\alpha$ 4 modestly increased with short-term TNF $\alpha$  exposure.

### ***Increased PGC-1 $\alpha$ 4 prevents hepatocyte apoptosis in response to inflammatory signaling***

Data so far suggested that different PGC-1 $\alpha$  isoforms influence inflammatory and anti-apoptotic signals in liver cells. Using gain- and loss-of-function models, we investigated whether PGC-1 $\alpha$ 1 or PGC-1 $\alpha$ 4 impacted cell death downstream of inflammatory signals *in vitro* and *in vivo*. Primary mouse hepatocytes over-expressing PGC-1 $\alpha$ 1 had increased cleaved caspase 3 (Fig 4A) and nucleosome fragmentation (Fig 4B) in response to TNF $\alpha$  treatment compared to vector, while over-expression of PGC-1 $\alpha$ 4 almost completely blocked apoptosis. To test this *in vivo* and avoid potentially confounding effects of inflammatory and immune responses caused by viral vectors, we created a transgenic mouse model permitting tissue-specific over-expression of PGC-1 $\alpha$ 4 (Fig 4C). Recombination at LoxP sites using Albumin promoter-driven Cre-recombinase removed a transcriptional Stop signal driving PGC-1 $\alpha$ 4 expression only in hepatocytes (PGC-1 $\alpha$ 4<sup>HepTg</sup>, Fig 4D, E). A small increase in PGC-1 $\alpha$ 4 transcripts in the absence of Cre-recombinase (LSLPGC-1 $\alpha$ 4, Fig 4C) indicated a low level of leaky transgene expression, but an increase of ~50-fold expression was observed in livers of PGC-1 $\alpha$ 4<sup>HepTg</sup> mice. Supporting an anti-apoptotic role for hepatic PGC-1 $\alpha$ 4, there were reduced levels of cleaved caspase 3 in livers of both male and female PGC-1 $\alpha$ 4<sup>HepTg</sup> mice following injection of LPS (Fig 4F).

Consistent with gain-of-function studies, mice lacking PGC-1 $\alpha$  in liver had increased cleaved caspase 3 levels when exposed to LPS (Fig 5A). However, this knockout model ablates all *Ppargc1a* transcripts, making it impossible to discern roles for any specific isoform. Thus, we created a mouse model where only the alternative promoter of *Ppargc1a* was disrupted in a tissue-specific manner (AltProm<sup>FL/FL</sup>), blunting expression of transcripts containing exon 1b and 1b' (including PGC-1 $\alpha$ 4), but not PGC-1 $\alpha$ 1 (Fig 5B). To assess efficiency of the promoter

337 knockout, primary hepatocytes from control and KO mice were treated with glucagon, which  
 338 significantly induced expression of multiple PGC-1 $\alpha$  transcripts (Fig 5C) and proteins (Fig 5D)  
 339 from both the proximal and alternative promoter in control AltProm<sup>FL/FL</sup> cells. In contrast,  
 340 ablation of the alternative promoter by crossing floxed mice with Alb-Cre<sup>Tg</sup> mice (AlbPromKO)  
 341 blunted induction of alternative transcripts in response to glucagon, yet increases in proximal  
 342 transcripts were similar to (or even higher than) control cells (Fig 5C). The 37kD PGC-1 $\alpha$  protein  
 343 induced by glucagon was almost completely ablated by knockout of the alternative promoter,  
 344 identifying PGC-1 $\alpha$ 4 as the predominant truncated PGC-1 $\alpha$  variant responsive to glucagon in liver  
 345 cells (Fig 5D). Consistent with PGC-1 $\alpha$ 4 being involved in prevention of apoptosis, hepatocytes  
 346 from AlbPromKO mice had higher basal and TNF $\alpha$ -induced cleaved caspase 3 levels (Fig 5E) and  
 347 increased fragmented nucleosomes in response to inflammatory signaling (Fig 5F) compared to  
 348 cells from littermate controls. Taken together, PGC-1 $\alpha$ 4 appears to have the unique ability to  
 349 prevent inflammatory-mediated apoptosis in liver cells.

350

## 351 **PGC-1 $\alpha$ isoforms differentially regulate pathways involved in inflammation and cell** 352 **survival**

353 In an attempt to identify transcription factors downstream of PGC-1 $\alpha$  variants that might  
 354 mediate these effects, we searched for transcription factor motifs and signatures enriched in gene  
 355 sets significantly changed by PGC-1 $\alpha$ 1 or PGC-1 $\alpha$ 4 alone, or shared, when TNF $\alpha$  was present (Fig  
 356 2) using iRegulon (Supplemental Table S4) and DiRE (Supplemental Fig. S6). A significant  
 357 number of genes unique to PGC-1 $\alpha$ 1 contained elements corresponding to ETV6 (TEL) binding  
 358 sites, a member of the ETS transcription factor family not previously associated with PGC-1 $\alpha$   
 359 activity. IRF4 motifs were enriched in genes shared by PGC-1 $\alpha$ 1 and PGC-1 $\alpha$ 4, consistent with  
 360 previous findings (Kong et al., 2014). However, many other novel motifs were enriched in this

361 subgroup, including those for ELK4, NR1H2 (LXR $\beta$ ), ZBTB33 (KAISO), ZFP143, and PITX2. In  
362 contrast, genes unique to PGC-1 $\alpha$ 4 were enriched in motifs for SP4, the NFY complex (NFYC/A),  
363 IRF6, GM7148 (TGIF2), PITX2, HSF4, and E2F1DP1. Among the 175 genes oppositely regulated  
364 by the variants, a unique set of motifs were identified, including binding sites for STAT, SPIB,  
365 NFATC2, and KLF4, transcription factors generally involved in cancer progression, apoptosis, and  
366 cell cycle. Narrowing our search to motifs within targets implicated in cell survival ([Fig 2D](#))  
367 revealed one transcription factor, ST18 (also known as MYT3 or NZF3), whose predicted binding  
368 site was enriched in 16 of these genes.

369 Focusing on the transcription factors with links to apoptosis and cell death, we surveyed  
370 whether over-expression of the PGC-1 $\alpha$  variants modulated expression of their target genes. SP4  
371 and STAT targets were repressed by increased PGC-1 $\alpha$ 1, but not remarkably changed by over-  
372 expression of PGC-1 $\alpha$ 4 ([Supplemental Fig. S7A,B](#)). NFY target genes were regulated similarly by  
373 the PGC-1 $\alpha$  variants, being generally repressed ([Supplemental Fig. S7C](#)). IRF4 targets *Tnfrsf17*  
374 and *Nip3* were increased by PGC-1 $\alpha$ 1, but not regulated by PGC-1 $\alpha$ 4 or TNF $\alpha$  treatment  
375 ([Supplemental Fig. S7D](#)). *Myc*, *Cdkn2a*, *Nfil3*, and *Casp3* expression were unchanged. PGC-1 $\alpha$ 1  
376 alone increased ST18 targets *Gata3*, *Foxc1* and *Atad3a* and repressed most other target genes  
377 ([Supplemental Fig. S7E](#)).

378 So far, our data illustrated that PGC-1 $\alpha$ 1 and PGC-1 $\alpha$ 4 had a variety of effects on  
379 expression of multiple mediators of inflammation and apoptosis. However, gene effects seen  
380 could not explain opposing effects on cell death observed for the variants in our *in vitro* models.  
381 Searching the microarray for candidate anti-apoptotic genes downstream of PGC-1 $\alpha$ 4, we  
382 identified *Birc2* (*Ciap1*) and *Tnfaip3* (also known as A20) ([Fig. 2A](#)), two anti-apoptotic proteins  
383 that prevent cell death downstream of inflammatory signalling. In a separate experiment, we  
384 confirmed that their transcript levels were significantly higher in mouse primary hepatocytes

385 over-expressing PGC-1 $\alpha$ 4 only in the presence of TNF $\alpha$  (Fig 6A). Related *Birc3* (*Ciap2*) was also  
 386 increased by TNF $\alpha$ /PGC-1 $\alpha$ 4, while *Birc5* expression did not change. In addition, transcripts for  
 387 apoptosis inhibitors *Naip* and *Xiap* were significantly increased by PGC-1 $\alpha$ 4, regardless of TNF $\alpha$   
 388 treatment. In contrast, over-expression of PGC-1 $\alpha$ 1 decreased expression of *Birc3*, *Birc5*, and  
 389 *Tnfaip3* (Fig 6A) and had no effect on *Naip* and *Xiap*.

390 Since these genes are all regulated by NF- $\kappa$ B, we hypothesized that PGC-1 $\alpha$ 4 might  
 391 enhance NF- $\kappa$ B activity, contrasting with reported repressive effects of PGC-1 $\alpha$ 1 on this pro-  
 392 inflammatory transcription factor. Basal expression of a 3x NF- $\kappa$ B response element reporter was  
 393 increased when PGC-1 $\alpha$ 1 was co-expressed in primary hepatocytes (Fig 6B); yet consistent with  
 394 previous findings (Alvarez-Guardia et al., 2010; Eisele et al., 2013), induction of the reporter by  
 395 TNF $\alpha$  was significantly blunted by high PGC-1 $\alpha$ 1. PGC-1 $\alpha$ 4 had no effect on basal or TNF $\alpha$ -  
 396 induced NF- $\kappa$ B reporter activity. Protein levels of p50 were decreased by both PGC-1 $\alpha$ 1 and PGC-  
 397 1 $\alpha$ 4 in the presence of TNF $\alpha$ , and p65 remained unchanged in all conditions. Over-expression of  
 398 PGC-1 $\alpha$ 1 modestly decreased IKK $\beta$  and I $\kappa$ B $\alpha$  proteins, which could relieve inhibition on NF- $\kappa$ B  
 399 and possibly explain increased basal activity. PGC-1 $\alpha$ 4 over-expression had no effect on these  
 400 proteins (Fig 6C). However, consistent with previous reports, increased PGC-1 $\alpha$ 1 significantly  
 401 decreased basal and/or TNF $\alpha$ -induced levels of pro-inflammatory genes *Mcp-1*, *Tnfa*, *I $\kappa$ b $\alpha$*  and  
 402 *Ccl5* in primary hepatocytes (Fig 6D), demonstrating a strong inhibitory role on NF- $\kappa$ B target  
 403 genes. In contrast, PGC-1 $\alpha$ 4 had little impact on these genes, except to potentiate the *Tnfa*  
 404 response similar to the pattern seen on the anti-apoptotic targets (Fig 6A).

405 In summary, PGC-1 $\alpha$ 1 had generally repressive effects on transcription of genes involved  
 406 in inflammation and cell death that were mostly independent of TNF $\alpha$ . In contrast, PGC-1 $\alpha$ 4  
 407 differentially enhanced a select program of anti-apoptotic factors in hepatocytes only in the  
 408 presence of inflammatory signaling. While we identified multiple genes involved in cell survival

409 oppositely regulated by the variants, enrichment of transcription factor motifs did not reveal the  
410 mechanism by which PGC-1 $\alpha$ 4 specifically enhances the anti-apoptotic gene program.

## 411 **DISCUSSION**

412 In the current study, we found that various non-canonical PGC-1 $\alpha$  protein variants are  
413 expressed in inflamed liver and differentially regulate hepatic inflammatory signaling. Gene set  
414 enrichment analysis revealed that in the presence of the inflammatory cytokine TNF $\alpha$ , PGC-1 $\alpha$ 4  
415 influences innate immunity and cell death, while PGC-1 $\alpha$ 1 remains primarily associated with  
416 mitochondrial function and metabolic processes. Gene ontology (GO) analysis illustrated that  
417 genes implicated in cell death and apoptosis appear to be oppositely regulated by these two  
418 variants. In primary liver cells, PGC-1 $\alpha$ 4 significantly blunted apoptosis in response to TNF $\alpha$ , a  
419 function that may be controlled by shuttling of PGC-1 $\alpha$ 4 between cytoplasm and nucleus. We  
420 conclude that alternative forms of PGC-1 $\alpha$  are induced in inflammatory environments, giving rise  
421 to increased levels of the truncated PGC-1 $\alpha$ 4 isoform that attenuates apoptosis downstream of  
422 inflammatory signaling. These findings give mechanistic insight into how PGC-1 $\alpha$ , as a family of  
423 proteins, facilitate parallel adaptation to metabolic demand and mitigation of inflammatory  
424 damage in cells.

425 Immune responses to danger signals are metabolically challenging and can lead to a trade-  
426 off between maintaining highly energy demanding processes of nutrient metabolism versus  
427 adaptation to inflammatory stimuli (Ganeshan et al., 2019). Inflammation itself may also inhibit  
428 metabolism and impede mitochondrial function. Here, we show that signaling via TNF $\alpha$  or LPS  
429 leads to a shift in the PGC-1 $\alpha$  gene program downstream of PGC-1 $\alpha$ 1 and PGC-1 $\alpha$ 4, ensuring that  
430 concurrent inflammatory signaling does not impede the ability to respond to metabolic need.  
431 This mechanism represents an additional layer by which the family of PGC-1 $\alpha$  proteins help  
432 balance an integrated metabolic response modulated by the inflammatory status of the liver.

433 It is now well established that PGC-1 $\alpha$  is a family of proteins created by alternative  
 434 splicing of the *PPARGC1A* gene in many tissues including skeletal muscle (Martinez-Redondo et  
 435 al., 2015; Ruas et al., 2012; Yoshioka et al., 2009), brown adipose tissue (Chang et al., 2010; Zhang  
 436 et al., 2009), and liver (Felder et al., 2011). However, a functional role for many of the alternative  
 437 isoforms remains unknown. While some PGC-1 $\alpha$  variants share overlapping functions with  
 438 canonical PGC-1 $\alpha$ 1 (Chang, Jun, & Park, 2016; Miura et al., 2008; Tadaishi, Miura, Kai, Kano, et al.,  
 439 2011; Thom et al., 2014; Wen et al., 2014), PGC-1 $\alpha$ 4 has distinct effector pathways in muscle and  
 440 brown adipose tissue (Chang et al., 2012; Ruas et al., 2012). We show here that PGC-1 $\alpha$ 1 and  
 441 PGC-1 $\alpha$ 4 also have differential effects on cell death downstream of inflammatory signals. PGC-  
 442 1 $\alpha$ 4 almost completely blocks apoptosis *in vitro* and *in vivo*, while PGC-1 $\alpha$ 1 decreases expression  
 443 of a broad program of inflammatory genes, but does not inhibit cell death in response to TNF $\alpha$ .  
 444 Mechanisms linking PGC-1 $\alpha$ , at least the canonical protein, to apoptosis have been proposed.  
 445 PGC-1 $\alpha$ 1 can induce apoptosis through PPAR $\gamma$ , TFAM, generation of reactive oxygen species, or  
 446 Ca<sup>2+</sup> signaling (Adhihetty et al., 2009; Bianchi et al., 2006; D'Errico et al., 2011; Onishi et al., 2014;  
 447 Zhang et al., 2007) or attenuate cell death through a p38/GSK3B/Nrf-2 axis or activation of p53  
 448 (Choi et al., 2017; Sen, Satija, & Das, 2011). Several splice variants coming from differentially  
 449 regulated promoters adds a layer of complexity, but also may explain existing (and often  
 450 conflicting) previous reports.

451 An obvious candidate effector in inflammation-mediated apoptosis is NF- $\kappa$ B. Consistent  
 452 with previous studies (Eisele & Handschin, 2014; Zhang et al., 2017), we show that PGC-1 $\alpha$ 1  
 453 represses NF- $\kappa$ B activity. However, unlike PGC-1 $\alpha$ 1, our evidence suggests no impact of PGC-1 $\alpha$ 4  
 454 on this transcription factor. Although PGC-1 $\alpha$ 4 shares the complete activation domain of PGC-  
 455 1 $\alpha$ 1, its alternative exon 1 and significant C-terminal truncation may lead PGC-1 $\alpha$ 4 to regulate a  
 456 different set of DNA-binding proteins. Our microarray identifies multiple pathways differentially



regulated by the two variants, including those targeted by NF- $\kappa$ B, SP4, NF-Y, ST18, STAT and IRF4. However, in our model system, PGC-1 $\alpha$ 4 did not appear to act as a traditional transcriptional coregulator for many of their gene targets. One possible explanation could be that PGC-1 $\alpha$ 4 instead promotes novel splicing events to create alternative gene products, similar to the function of related PGC-1 $\alpha$ 2 and PGC-1 $\alpha$ 3 variants (Martinez-Redondo et al., 2016). Aberrant alternative splicing can substantially affect cellular function and is associated with disease. For example, alternative splicing of TNF $\alpha$ -regulated genes (such as *Tnfaip3*) produces protein variants with distinct roles in cell death and cell survival (Lopez-Urrutia, Campos-Parra, Herrera, & Perez-Plasencia, 2017).

While the exclusive nuclear localization of PGC-1 $\alpha$ 1 supports its function as a transcriptional coactivator, the ability of PGC-1 $\alpha$ 4 to shuttle between compartments suggests that it might interact with transcription factors in the cytoplasm and/or regulate their entry into the nucleus, a possibility also supported by our GSEA analysis. Interferon (INF) regulatory factors (IRFs) are well-known transcription factors that shuttle in response to inflammatory stimuli (Reich, 2002) and our data suggest that both PGC-1 $\alpha$ 1 and PGC-1 $\alpha$ 4 converge on interferon signaling in liver cells. Canonical PGC-1 $\alpha$  has been associated with interferon response in the contexts of HCV infection and thermogenesis (Kong et al., 2014; Shlomai et al., 2012). Interestingly, three interferon regulatory factors (IRF1, IRF4, IRF6) were identified in our motif enrichment analysis and numerous studies implicate interferons as critical regulators of apoptosis (Chattopadhyay et al., 2010; Kim et al., 2004). Although we focused on TNF signaling, our data suggest that PGC-1 $\alpha$ 1 and PGC-1 $\alpha$ 4 might also regulate the interferon response; however, further studies are necessary to confirm this hypothesis.

PGC-1 $\alpha$ 4 shares many similarities to another isoform, NT-PGC-1 $\alpha$ , which is transcribed from the proximal promoter. Both have two N-terminal nuclear exclusion signals and three



481 putative phosphorylation (S190, S237, and T252) sites, which regulate nuclear shuttling of NT-  
 482 PGC-1 $\alpha$  (Chang et al., 2010). Our data are consistent with reports describing cytoplasmic to  
 483 nuclear movement of other truncated variants of PGC-1 $\alpha$  (Chang et al., 2010; Zhang et al., 2009).  
 484 Given similarities between these two proteins, it is possible that NT-PGC-1 $\alpha$  localization is also  
 485 regulated by inflammation similar to PGC-1 $\alpha$ 4, and while likely, it remains to be seen whether  
 486 PGC-1 $\alpha$ 4 and NT-PGC-1 $\alpha$  have overlapping functions.

487 We note that only transcripts from the alternative promoter were increased in human  
 488 NASH and cirrhotic livers, and proximal transcripts appeared to decrease in cirrhosis. This would  
 489 suggest that inflammatory signals shift preference from the proximal to the alternative PGC-1 $\alpha$   
 490 promoter and imply that PGC-1 $\alpha$ 4 (from the alternative promoter) could be the predominant  
 491 truncated isoform influencing apoptosis in inflamed human liver. This shift in *PPARGC1A*  
 492 promoter usage is consistent with previous studies showing a shift to the proximal promoter  
 493 upon cold exposure in brown adipose tissue and to the alternative promoter upon exercise in  
 494 skeletal muscle (Chinsomboon et al., 2009; Norrbom et al., 2011; Popov et al., 2014; Popov et al.,  
 495 2015; Tadaishi, Miura, Kai, Kawasaki, et al., 2011; Thom et al., 2014; Wen et al., 2014; Ydfors et  
 496 al., 2013). Our data also imply boosting expression of multiple PGC-1 $\alpha$  isoforms could allow liver  
 497 cells to more efficiently respond to energy demand when faced with both high metabolic and  
 498 inflammatory challenges associated with metabolic disease.

499 In summary, we show that PGC-1 $\alpha$ 4 is present in mouse and human liver, and is induced  
 500 within the context of inflammation. TNF $\alpha$  dynamically regulates localization of PGC-1 $\alpha$ 4 in liver  
 501 cells and this isoform plays a role in the prevention of liver cell apoptosis downstream of this  
 502 inflammatory cytokine and LPS. We also show that PGC-1 $\alpha$ 1 and PGC-1 $\alpha$ 4 influence TNF $\alpha$   
 503 signaling in liver cells in different, yet complementary ways. Increased PGC-1 $\alpha$ 1 generally  
 504 represses expression of inflammatory genes, while PGC-1 $\alpha$ 4 activity promotes pathways that

inhibit apoptosis. Mechanisms underlying the anti-apoptotic role of hepatic PGC-1 $\alpha$  appear complex, possibly involving interaction with cytoplasmic proteins, dominant-negative effects on other PGC-1 $\alpha$  variants, or regulation of alternative splicing of genes implicated in apoptosis. In conclusion, coordinated activity of these PGC-1 $\alpha$  isoforms allows fine-tuning of metabolic and inflammatory networks, supporting efficient adaptation to energy demand within the highly dynamic and inflammatory environment of the liver. Offsetting this balance could result in inefficient nutrient metabolism and/or inappropriate responses to inflammatory stimuli, which may play a role in the pathogenesis of NAFLD or NASH.

## ACKNOWLEDGEMENTS

Research was supported by grants from the CIHR (PJT-148771) and IDRC (108591-001) to JLE, and the Swedish Research Council and Karolinska Institutet to JLR. ML received a doctoral scholarship and JLE a Chercheur-boursier from the FRQS. SJ and NJ are supported by post-doctoral fellowships from Diabetes Canada and the Montreal Diabetes Research Centre. We thank Dr Bruce Spiegelman for generating the AlbProm<sup>FL/FL</sup> mouse line and members of the IRCM animal, microscopy, and molecular biology core facilities for invaluable technical assistance.

## ***Author contributions:***

ML, ABP, NJ, SJ, JLR and JLE designed concept and experiments. ML, ABP, NJ, SJ, NPK, SS, CB, AD, JC, JB and PJ performed and analyzed experiments. SKP, AL, and PM created the human liver biobank, characterized samples, and contributed to analysis design. ML, ABP, NJ, SJ, JLR and JLE wrote the manuscript. All authors reviewed the manuscript.

## REFERENCES

- Adhihetty, P. J., Uguccioni, G., Leick, L., Hidalgo, J., Pilegaard, H., & Hood, D. A. (2009). The role of PGC-1alpha on mitochondrial function and apoptotic susceptibility in muscle. *Am J Physiol Cell Physiol*, 297(1), C217-225. doi:10.1152/ajpcell.00070.2009
- Alvarez-Guardia, D., Palomer, X., Coll, T., Davidson, M. M., Chan, T. O., Feldman, A. M., . . . Vazquez-Carrera, M. (2010). The p65 subunit of NF-kappaB binds to PGC-1alpha, linking inflammation and metabolic disturbances in cardiac cells. *Cardiovasc Res*, 87(3), 449-458. doi:10.1093/cvr/cvq080
- Arany, Z., Foo, S. Y., Ma, Y., Ruas, J. L., Bommi-Reddy, A., Girnun, G., . . . Spiegelman, B. M. (2008). HIF-independent regulation of VEGF and angiogenesis by the transcriptional coactivator PGC-1alpha. *Nature*, 451(7181), 1008-1012. doi:10.1038/nature06613
- Baar, K., Wende, A. R., Jones, T. E., Marison, M., Nolte, L. A., Chen, M., . . . Holloszy, J. O. (2002). Adaptations of skeletal muscle to exercise: rapid increase in the transcriptional coactivator PGC-1. *FASEB J*, 16(14), 1879-1886. doi:10.1096/fj.02-0367com
- Besse-Patin, A., Jeromson, S., Levesque-Damphousse, P., Secco, B., Laplante, M., & Estall, J. L. (2019). PGC1A regulates the IRS1:IRS2 ratio during fasting to influence hepatic metabolism downstream of insulin. *Proc Natl Acad Sci U S A*. doi:10.1073/pnas.1815150116
- Besse-Patin, A., Leveille, M., Oropeza, D., Nguyen, B. N., Prat, A., & Estall, J. L. (2017). Estrogen Signals Through Peroxisome Proliferator-Activated Receptor-gamma Coactivator 1alpha to Reduce Oxidative Damage Associated With Diet-Induced Fatty Liver Disease. *Gastroenterology*, 152(1), 243-256. doi:10.1053/j.gastro.2016.09.017

551 Bianchi, K., Vandecasteele, G., Carli, C., Romagnoli, A., Szabadkai, G., & Rizzuto, R. (2006).  
552 Regulation of Ca<sup>2+</sup> signalling and Ca<sup>2+</sup>-mediated cell death by the transcriptional  
553 coactivator PGC-1alpha. *Cell Death Differ*, 13(4), 586-596. doi:10.1038/sj.cdd.4401784

554 Bogdanos, D. P., Gao, B., & Gershwin, M. E. (2013). Liver immunology. *Compr Physiol*, 3(2), 567-  
555 598. doi:10.1002/cphy.c120011

556 Buler, M., Aatsinki, S. M., Skoumal, R., Komka, Z., Toth, M., Kerkela, R., . . . Hakkola, J. (2012).  
557 Energy-sensing factors coactivator peroxisome proliferator-activated receptor gamma  
558 coactivator 1-alpha (PGC-1alpha) and AMP-activated protein kinase control expression of  
559 inflammatory mediators in liver: induction of interleukin 1 receptor antagonist. *J Biol*  
560 *Chem*, 287(3), 1847-1860. doi:10.1074/jbc.M111.302356

561 Chan, M. C., Rowe, G. C., Raghuram, S., Patten, I. S., Farrell, C., & Arany, Z. (2014). Post-natal  
562 induction of PGC-1alpha protects against severe muscle dystrophy independently of  
563 utrophin. *Skelet Muscle*, 4(1), 2. doi:10.1186/2044-5040-4-2

564 Chang, J. S., Fernand, V., Zhang, Y., Shin, J., Jun, H. J., Joshi, Y., & Gettys, T. W. (2012). NT-PGC-  
565 1alpha protein is sufficient to link beta3-adrenergic receptor activation to transcriptional  
566 and physiological components of adaptive thermogenesis. *J Biol Chem*, 287(12), 9100-  
567 9111. doi:10.1074/jbc.M111.320200

568 Chang, J. S., Huypens, P., Zhang, Y., Black, C., Kralli, A., & Gettys, T. W. (2010). Regulation of NT-  
569 PGC-1alpha subcellular localization and function by protein kinase A-dependent  
570 modulation of nuclear export by CRM1. *J Biol Chem*, 285(23), 18039-18050.  
571 doi:10.1074/jbc.M109.083121

572 Chang, J. S., Jun, H. J., & Park, M. (2016). Transcriptional coactivator NT-PGC-1alpha promotes  
573 gluconeogenic gene expression and enhances hepatic gluconeogenesis. *Physiol Rep*, 4(20).  
574 doi:10.14814/phy2.13013

575 Chattopadhyay, S., Marques, J. T., Yamashita, M., Peters, K. L., Smith, K., Desai, A., . . . Sen, G. C.  
576 (2010). Viral apoptosis is induced by IRF-3-mediated activation of Bax. *EMBO J*, 29(10),  
577 1762-1773. doi:10.1038/emboj.2010.50

578 Chinsomboon, J., Ruas, J., Gupta, R. K., Thom, R., Shoag, J., Rowe, G. C., . . . Arany, Z. (2009). The  
579 transcriptional coactivator PGC-1alpha mediates exercise-induced angiogenesis in skeletal  
580 muscle. *Proc Natl Acad Sci U S A*, 106(50), 21401-21406. doi:10.1073/pnas.0909131106

581 Choi, H. I., Kim, H. J., Park, J. S., Kim, I. J., Bae, E. H., Ma, S. K., & Kim, S. W. (2017). PGC-1alpha  
582 attenuates hydrogen peroxide-induced apoptotic cell death by upregulating Nrf-2 via  
583 GSK3beta inactivation mediated by activated p38 in HK-2 Cells. *Sci Rep*, 7(1), 4319.  
584 doi:10.1038/s41598-017-04593-w

585 D'Errico, I., Salvatore, L., Murzilli, S., Lo Sasso, G., Latorre, D., Martelli, N., . . . Moschetta, A. (2011).  
586 Peroxisome proliferator-activated receptor-gamma coactivator 1-alpha (PGC1alpha) is a  
587 metabolic regulator of intestinal epithelial cell fate. *Proc Natl Acad Sci U S A*, 108(16),  
588 6603-6608. doi:10.1073/pnas.1016354108

589 Dinulovic, I., Furrer, R., Di Fulvio, S., Ferry, A., Beer, M., & Handschin, C. (2016). PGC-1alpha  
590 modulates necrosis, inflammatory response, and fibrotic tissue formation in injured  
591 skeletal muscle. *Skelet Muscle*, 6, 38. doi:10.1186/s13395-016-0110-x

592 Eisele, P. S., Furrer, R., Beer, M., & Handschin, C. (2015). The PGC-1 coactivators promote an anti-  
593 inflammatory environment in skeletal muscle in vivo. *Biochem Biophys Res Commun*,  
594 464(3), 692-697. doi:10.1016/j.bbrc.2015.06.166

595 Eisele, P. S., & Handschin, C. (2014). Functional crosstalk of PGC-1 coactivators and inflammation  
596 in skeletal muscle pathophysiology. *Semin Immunopathol*, 36(1), 27-53.  
597 doi:10.1007/s00281-013-0406-4

598 Eisele, P. S., Salatino, S., Sobek, J., Hottiger, M. O., & Handschin, C. (2013). The peroxisome  
 599 proliferator-activated receptor gamma coactivator 1alpha/beta (PGC-1) coactivators  
 600 repress the transcriptional activity of NF-kappaB in skeletal muscle cells. *J Biol Chem*,  
 601 288(4), 2246-2260. doi:10.1074/jbc.M112.375253

602 Estall, J. L., Kahn, M., Cooper, M. P., Fisher, F. M., Wu, M. K., Laznik, D., . . . Spiegelman, B. M. (2009).  
 603 Sensitivity of lipid metabolism and insulin signaling to genetic alterations in hepatic  
 604 peroxisome proliferator-activated receptor-gamma coactivator-1alpha expression.  
 605 *Diabetes*, 58(7), 1499-1508. doi:10.2337/db08-1571

606 Estall, J. L., Ruas, J. L., Choi, C. S., Laznik, D., Badman, M., Maratos-Flier, E., . . . Spiegelman, B. M.  
 607 (2009). PGC-1alpha negatively regulates hepatic FGF21 expression by modulating the  
 608 heme/Rev-Erb(alpha) axis. *Proc Natl Acad Sci U S A*, 106(52), 22510-22515.  
 609 doi:10.1073/pnas.0912533106

610 Felder, T. K., Soyak, S. M., Oberkofler, H., Hahne, P., Auer, S., Weiss, R., . . . Patsch, W. (2011).  
 611 Characterization of novel peroxisome proliferator-activated receptor gamma coactivator-  
 612 1alpha (PGC-1alpha) isoform in human liver. *J Biol Chem*, 286(50), 42923-42936.  
 613 doi:10.1074/jbc.M111.227496

614 Ganeshan, K., Nikkanen, J., Man, K., Leong, Y. A., Sogawa, Y., Maschek, J. A., . . . Chawla, A. (2019).  
 615 Energetic Trade-Offs and Hypometabolic States Promote Disease Tolerance. *Cell*, 177(2),  
 616 399-413 e312. doi:10.1016/j.cell.2019.01.050

617 Handschin, C., Kobayashi, Y. M., Chin, S., Seale, P., Campbell, K. P., & Spiegelman, B. M. (2007).  
 618 PGC-1alpha regulates the neuromuscular junction program and ameliorates Duchenne  
 619 muscular dystrophy. *Genes Dev*, 21(7), 770-783. doi:10.1101/gad.1525107

620 Kelly, D. P., & Scarpulla, R. C. (2004). Transcriptional regulatory circuits controlling  
621 mitochondrial biogenesis and function. *Genes Dev*, 18(4), 357-368.  
622 doi:10.1101/gad.1177604

623 Kim, P. K., Armstrong, M., Liu, Y., Yan, P., Bucher, B., Zuckerbraun, B. S., . . . Yim, J. H. (2004). IRF-1  
624 expression induces apoptosis and inhibits tumor growth in mouse mammary cancer cells  
625 in vitro and in vivo. *Oncogene*, 23(5), 1125-1135. doi:10.1038/sj.onc.1207023

626 Kong, X., Banks, A., Liu, T., Kazak, L., Rao, R. R., Cohen, P., . . . Rosen, E. D. (2014). IRF4 is a key  
627 thermogenic transcriptional partner of PGC-1alpha. *Cell*, 158(1), 69-83.  
628 doi:10.1016/j.cell.2014.04.049

629 Lin, J., Wu, H., Tarr, P. T., Zhang, C. Y., Wu, Z., Boss, O., . . . Spiegelman, B. M. (2002). Transcriptional  
630 co-activator PGC-1 alpha drives the formation of slow-twitch muscle fibres. *Nature*,  
631 418(6899), 797-801. doi:10.1038/nature00904

632 Lopez-Urrutia, E., Campos-Parra, A., Herrera, L. A., & Perez-Plasencia, C. (2017). Alternative  
633 splicing regulation in tumor necrosis factor-mediated inflammation. *Oncol Lett*, 14(5),  
634 5114-5120. doi:10.3892/ol.2017.6905

635 Martinez-Redondo, V., Jannig, P. R., Correia, J. C., Ferreira, D. M., Cervenka, I., Lindvall, J. M., . . .  
636 Ruas, J. L. (2016). Peroxisome Proliferator-activated Receptor gamma Coactivator-1 alpha  
637 Isoforms Selectively Regulate Multiple Splicing Events on Target Genes. *J Biol Chem*,  
638 291(29), 15169-15184. doi:10.1074/jbc.M115.705822

639 Martinez-Redondo, V., Pettersson, A. T., & Ruas, J. L. (2015). The hitchhiker's guide to PGC-1alpha  
640 isoform structure and biological functions. *Diabetologia*, 58(9), 1969-1977.  
641 doi:10.1007/s00125-015-3671-z

642 Miura, S., Kai, Y., Kamei, Y., & Ezaki, O. (2008). Isoform-specific increases in murine skeletal  
643 muscle peroxisome proliferator-activated receptor-gamma coactivator-1alpha (PGC-

644 1alpha) mRNA in response to beta2-adrenergic receptor activation and exercise.  
645 *Endocrinology*, 149(9), 4527-4533. doi:10.1210/en.2008-0466

646 Norrbom, J., Sallstedt, E. K., Fischer, H., Sundberg, C. J., Rundqvist, H., & Gustafsson, T. (2011).  
647 Alternative splice variant PGC-1alpha-b is strongly induced by exercise in human skeletal  
648 muscle. *Am J Physiol Endocrinol Metab*, 301(6), E1092-1098.  
649 doi:10.1152/ajpendo.00119.2011

650 Onishi, Y., Ueha, T., Kawamoto, T., Hara, H., Toda, M., Harada, R., . . . Akisue, T. (2014). Regulation  
651 of mitochondrial proliferation by PGC-1alpha induces cellular apoptosis in  
652 musculoskeletal malignancies. *Sci Rep*, 4, 3916. doi:10.1038/srep03916

653 Popov, D. V., Bachinin, A. V., Lysenko, E. A., Miller, T. F., & Vinogradova, O. L. (2014). Exercise-  
654 induced expression of peroxisome proliferator-activated receptor gamma coactivator-  
655 1alpha isoforms in skeletal muscle of endurance-trained males. *J Physiol Sci*, 64(5), 317-  
656 323. doi:10.1007/s12576-014-0321-z

657 Popov, D. V., Lysenko, E. A., Vepkhvadze, T. F., Kurochkina, N. S., Maknovskii, P. A., & Vinogradova,  
658 O. L. (2015). Promoter-specific regulation of PPARGC1A gene expression in human  
659 skeletal muscle. *J Mol Endocrinol*, 55(2), 159-168. doi:10.1530/JME-15-0150

660 Rao, R. R., Long, J. Z., White, J. P., Svensson, K. J., Lou, J., Lokurkar, I., . . . Spiegelman, B. M. (2014).  
661 Meteorin-like is a hormone that regulates immune-adipose interactions to increase beige  
662 fat thermogenesis. *Cell*, 157(6), 1279-1291. doi:10.1016/j.cell.2014.03.065

663 Reich, N. C. (2002). Nuclear/cytoplasmic localization of IRFs in response to viral infection or  
664 interferon stimulation. *J Interferon Cytokine Res*, 22(1), 103-109.  
665 doi:10.1089/107999002753452719



666 Ruas, J. L., White, J. P., Rao, R. R., Kleiner, S., Brannan, K. T., Harrison, B. C., . . . Spiegelman, B. M.  
667 (2012). A PGC-1alpha isoform induced by resistance training regulates skeletal muscle  
668 hypertrophy. *Cell*, 151(6), 1319-1331. doi:10.1016/j.cell.2012.10.050

669 Schilling, J., Lai, L., Sambandam, N., Dey, C. E., Leone, T. C., & Kelly, D. P. (2011). Toll-like receptor-  
670 mediated inflammatory signaling reprograms cardiac energy metabolism by repressing  
671 peroxisome proliferator-activated receptor gamma coactivator-1 signaling. *Circ Heart Fail*,  
672 4(4), 474-482. doi:10.1161/CIRCHEARTFAILURE.110.959833

673 Sczelecki, S., Besse-Patin, A., Abboud, A., Kleiner, S., Laznik-Bogoslavski, D., Wrann, C. D., . . . Estall,  
674 J. L. (2014). Loss of Pgc-1alpha expression in aging mouse muscle potentiates glucose  
675 intolerance and systemic inflammation. *Am J Physiol Endocrinol Metab*, 306(2), E157-167.  
676 doi:10.1152/ajpendo.00578.2013

677 Sen, N., Satija, Y. K., & Das, S. (2011). PGC-1alpha, a key modulator of p53, promotes cell survival  
678 upon metabolic stress. *Mol Cell*, 44(4), 621-634. doi:10.1016/j.molcel.2011.08.044

679 Shlomai, A., Rechtman, M. M., Burdelova, E. O., Zilberberg, A., Hoffman, S., Solar, I., . . . Sklan, E. H.  
680 (2012). The metabolic regulator PGC-1alpha links hepatitis C virus infection to hepatic  
681 insulin resistance. *J Hepatol*, 57(4), 867-873. doi:10.1016/j.jhep.2012.06.021

682 Tadaishi, M., Miura, S., Kai, Y., Kano, Y., Oishi, Y., & Ezaki, O. (2011). Skeletal muscle-specific  
683 expression of PGC-1alpha-b, an exercise-responsive isoform, increases exercise capacity  
684 and peak oxygen uptake. *PLoS One*, 6(12), e28290. doi:10.1371/journal.pone.0028290

685 Tadaishi, M., Miura, S., Kai, Y., Kawasaki, E., Koshinaka, K., Kawanaka, K., . . . Ezaki, O. (2011).  
686 Effect of exercise intensity and AICAR on isoform-specific expressions of murine skeletal  
687 muscle PGC-1alpha mRNA: a role of beta(2)-adrenergic receptor activation. *Am J Physiol*  
688 *Endocrinol Metab*, 300(2), E341-349. doi:10.1152/ajpendo.00400.2010

689 Thom, R., Rowe, G. C., Jang, C., Safdar, A., & Arany, Z. (2014). Hypoxic induction of vascular  
690 endothelial growth factor (VEGF) and angiogenesis in muscle by truncated peroxisome  
691 proliferator-activated receptor gamma coactivator (PGC)-1alpha. *J Biol Chem*, 289(13),  
692 8810-8817. doi:10.1074/jbc.M114.554394

693 Tran, M., Tam, D., Bardia, A., Bhasin, M., Rowe, G. C., Kher, A., . . . Parikh, S. M. (2011). PGC-1alpha  
694 promotes recovery after acute kidney injury during systemic inflammation in mice. *J Clin*  
695 *Invest*, 121(10), 4003-4014. doi:10.1172/JCI58662

696 Wen, X., Wu, J., Chang, J. S., Zhang, P., Wang, J., Zhang, Y., . . . Zhang, Y. (2014). Effect of exercise  
697 intensity on isoform-specific expressions of NT-PGC-1 alpha mRNA in mouse skeletal  
698 muscle. *Biomed Res Int*, 2014, 402175. doi:10.1155/2014/402175

699 Wu, Z., Puigserver, P., Andersson, U., Zhang, C., Adelmant, G., Mootha, V., . . . Spiegelman, B. M.  
700 (1999). Mechanisms controlling mitochondrial biogenesis and respiration through the  
701 thermogenic coactivator PGC-1. *Cell*, 98(1), 115-124. doi:10.1016/S0092-8674(00)80611-  
702 X

703 Ydfors, M., Fischer, H., Mascher, H., Blomstrand, E., Norrbom, J., & Gustafsson, T. (2013). The  
704 truncated splice variants, NT-PGC-1alpha and PGC-1alpha4, increase with both endurance  
705 and resistance exercise in human skeletal muscle. *Physiol Rep*, 1(6), e00140.  
706 doi:10.1002/phy2.140

707 Yoon, J. C., Puigserver, P., Chen, G., Donovan, J., Wu, Z., Rhee, J., . . . Spiegelman, B. M. (2001).  
708 Control of hepatic gluconeogenesis through the transcriptional coactivator PGC-1. *Nature*,  
709 413(6852), 131-138. doi:10.1038/35093050

710 Yoshioka, T., Inagaki, K., Noguchi, T., Sakai, M., Ogawa, W., Hosooka, T., . . . Kasuga, M. (2009).  
711 Identification and characterization of an alternative promoter of the human PGC-1alpha  
712 gene. *Biochem Biophys Res Commun*, 381(4), 537-543. doi:10.1016/j.bbrc.2009.02.077

713 Zhang, Y., Ba, Y., Liu, C., Sun, G., Ding, L., Gao, S., . . . Zhang, C. Y. (2007). PGC-1alpha induces  
714 apoptosis in human epithelial ovarian cancer cells through a PPARgamma-dependent  
715 pathway. *Cell Res*, 17(4), 363-373. doi:10.1038/cr.2007.11

716 Zhang, Y., Chen, C., Jiang, Y., Wang, S., Wu, X., & Wang, K. (2017). PPARgamma coactivator-1alpha  
717 (PGC-1alpha) protects neuroblastoma cells against amyloid-beta (Abeta) induced cell  
718 death and neuroinflammation via NF-kappaB pathway. *BMC Neurosci*, 18(1), 69.  
719 doi:10.1186/s12868-017-0387-7

720 Zhang, Y., Huypens, P., Adamson, A. W., Chang, J. S., Henagan, T. M., Boudreau, A., . . . Gettys, T. W.  
721 (2009). Alternative mRNA splicing produces a novel biologically active short isoform of  
722 PGC-1alpha. *J Biol Chem*, 284(47), 32813-32826. doi:10.1074/jbc.M109.037556

723

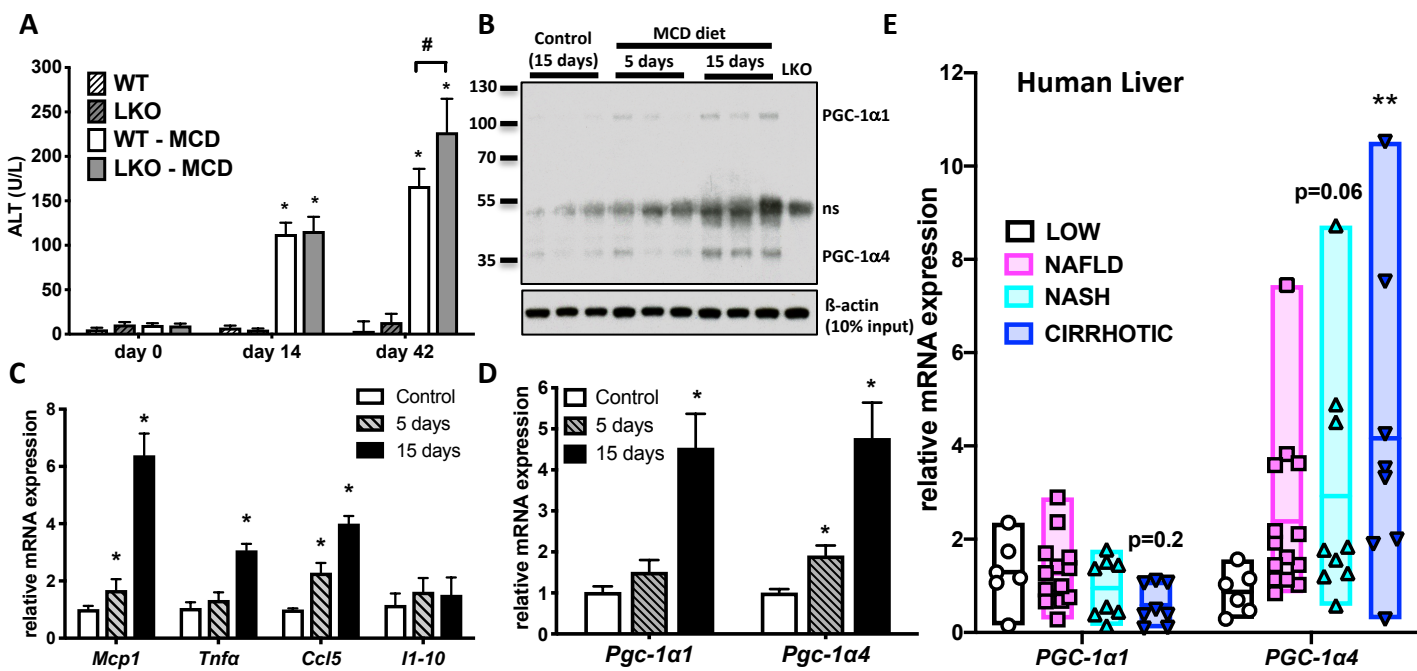

**Figure 1: PGC-1α expression is increased in the presence of inflammatory liver damage.** A) Serum ALT levels in male WT or LKO mice on MCD (or matched control) diet for 42 days (n = 10-11 mice). \*p<0.05 Control versus MCD diet, #p<0.05 WT versus LKO. B) Western blot of immunoprecipitated PGC-1α proteins (n = 3 mice). Loading control (β-actin) represents 10% of input proteins used for immunoprecipitation. C, D) mRNA levels of detectable PGC-1α isoforms (n = 4 mice) from livers of mice fed control or MCD diet for 5 or 15 days. \*p<0.05 versus control levels. Data are representative of 2 independent experiments. E) mRNA levels of PGC-1α isoforms in human liver tissues. NAS values: Low ≤ 2 (n = 6), NAFLD = 3-5 (n = 14), NASH = 6-9 (n = 9), Cirrhotic = 7-9 + fibrosis (n = 8). Bars represent max. to min., line represents mean.

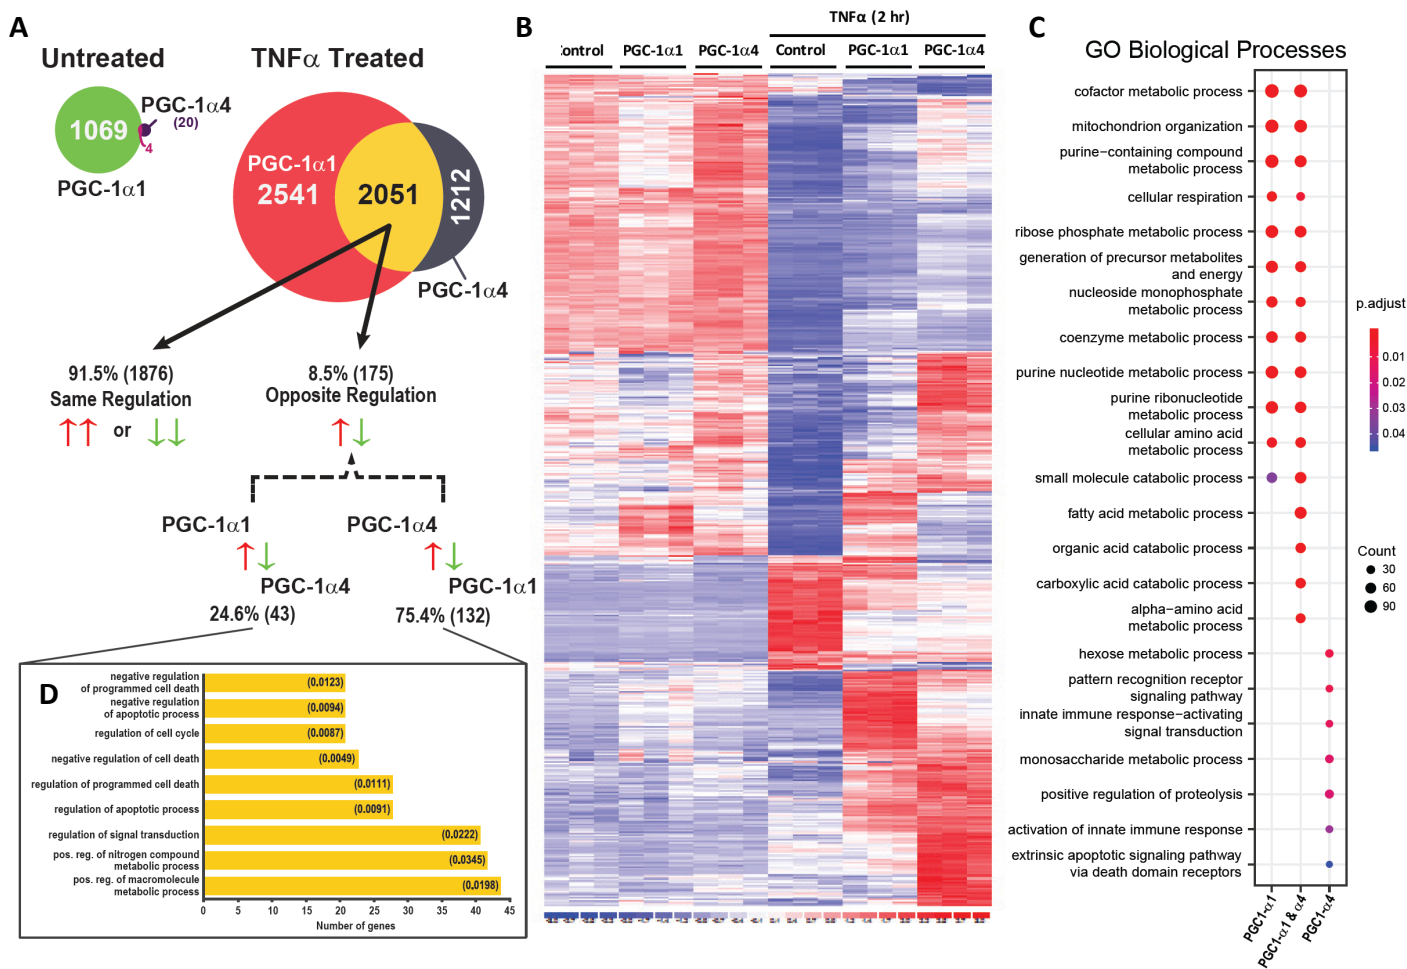

**Figure 2: PGC-1 $\alpha$  isoforms differentially regulate inflammatory and metabolic signaling pathways downstream of TNF $\alpha$ .** Gene expression microarrays of mRNA isolated from primary mouse hepatocytes over-expressing either PGC-1 $\alpha$ 1, PGC-1 $\alpha$ 4, or vector control by adenoviral infection. A) Number of genes changed greater than 2-fold 48 hr following transduction in the absence or presence of 2 ng/mL TNF $\alpha$  (2 hr) (n = 3 biological replicates, p<0.5, FDR: 1%). B) Clustering of genes significantly changed by over-expression of PGC-1 $\alpha$ 4 in primary hepatocytes in the presence of TNF $\alpha$ . C) Top 10 gene ontology pathways were identified from each list generated from TNF $\alpha$ -treated samples in A and listed on x-axis. Size of dot represents number of genes identified in each pathway, in comparison to other genotypes. D) GO analysis of terms associated with 175 genes regulated in the opposite direction.

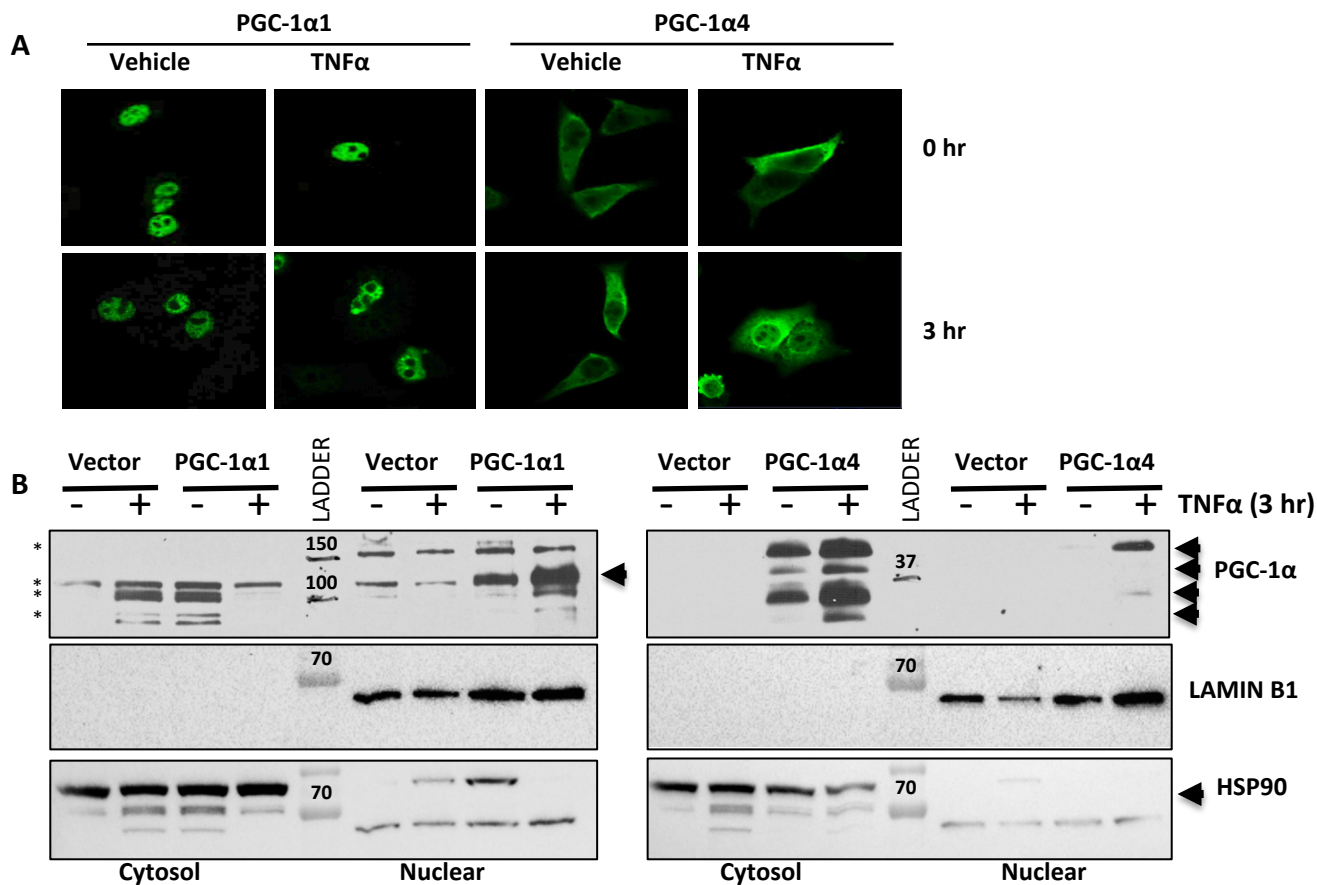

**Figure 3: TNF $\alpha$  signaling promotes mobilization of cytoplasmic PGC-1 $\alpha$ 4 to nuclear and perinuclear regions.** A) Confocal imaging of H2.35 mouse liver cells transfected with plasmids expressing V5-tagged PGC-1 $\alpha$ 1 or PGC-1 $\alpha$ 4 treated with 20 ng/mL TNF $\alpha$  or vehicle (PBS) for 3 hours. B) Cell fractionation of H2.35 mouse liver cells transduced with adenovirus expressing control vector, PGC-1 $\alpha$ 1 or PGC-1 $\alpha$ 4. Images are representative of at least 3 independent experiments. \*non-specific bands.

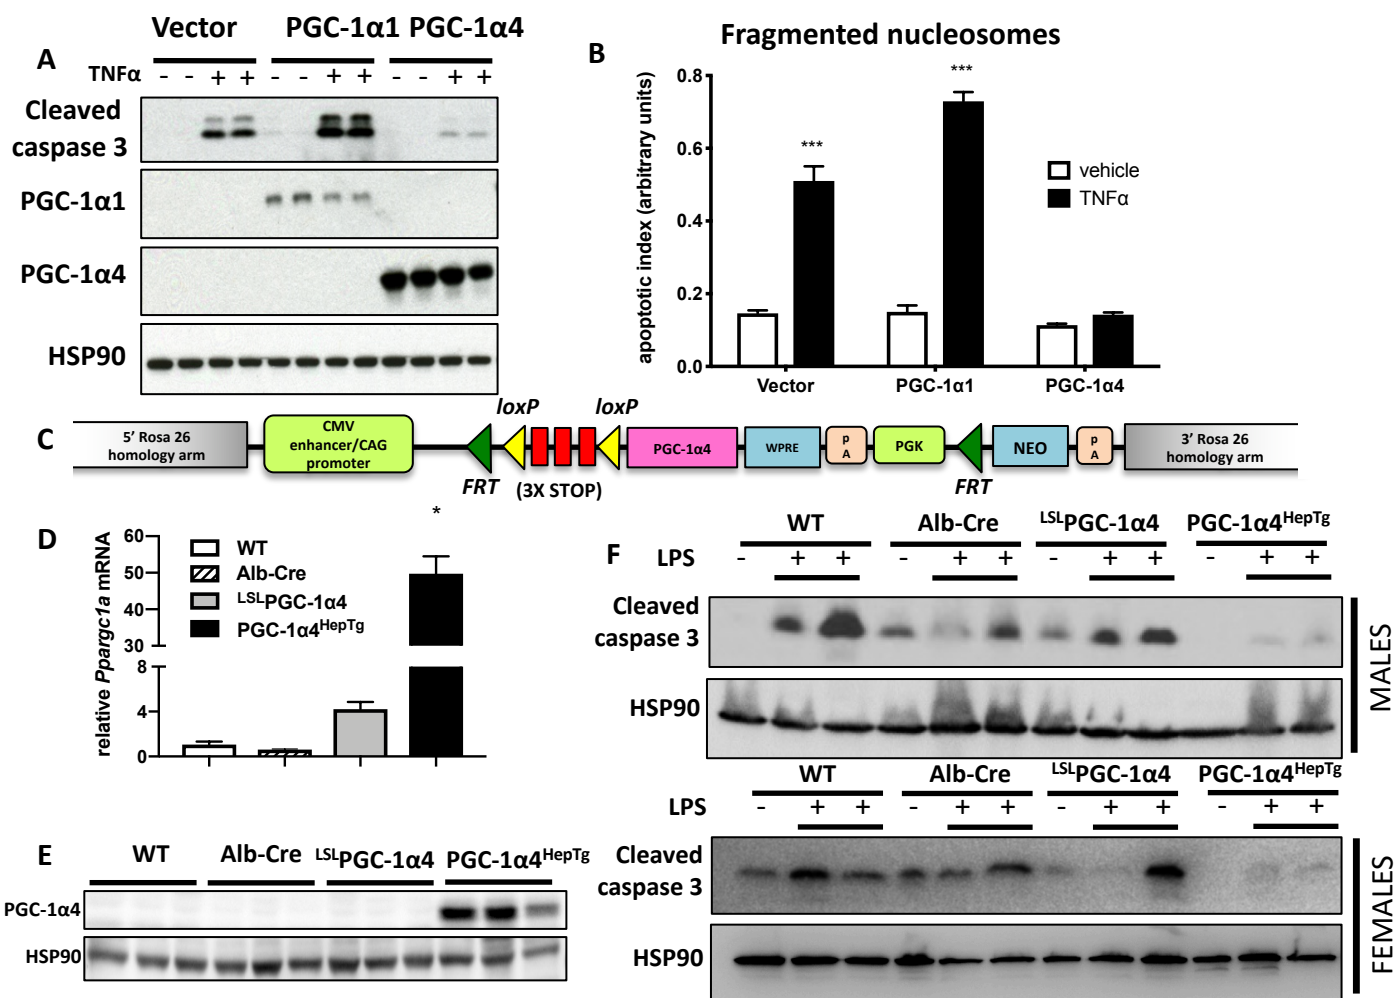

**Figure 4: Over-expression of PGC-1 $\alpha$ 4 protects against liver cell apoptosis induced by inflammatory signals.** A) Western blot and B) fragmented nucleosomes in primary mouse hepatocytes over-expressing either PGC-1 $\alpha$ 1, PGC-1 $\alpha$ 4, or vector control by adenoviral infection, treated with or without 20 ng/mL TNF $\alpha$  for 8 hours. \*\*\* $p$ <0.001 versus vehicle. Data are representative of 3 independent experiments. C) Targeting construct for transgenic mouse allowing tissue-specific over-expression of PGC-1 $\alpha$ 4 D) mRNA and E) protein from livers of transgenic mice ( $n = 3$ ) following cross with Albumin-Cre Tg mice to drive PGC-1 $\alpha$ 4 only in hepatocytes. \* $p$ <0.05 versus WT control. F) Western blot of liver protein from male and female mice 6 hours following tail-vein injection of 2 mg/kg LPS ( $n = 6$ ) or vehicle (PBS) ( $n = 3$ ).



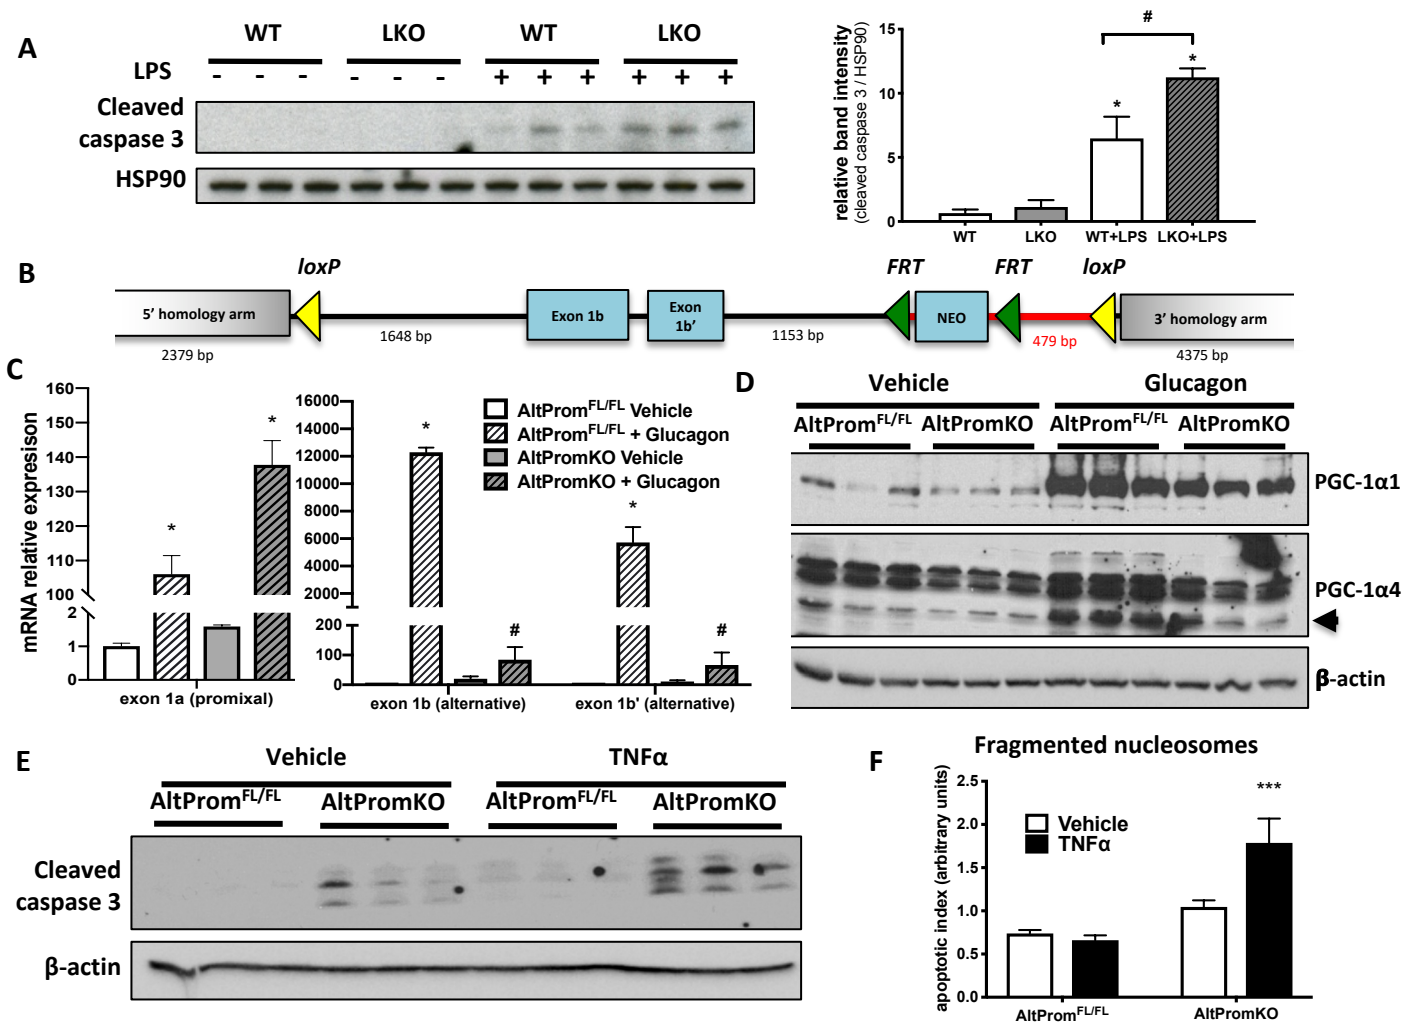

**Figure 5: Loss of PGC-1α4 expression enhances apoptosis in response to TNFα.** A) Western blot of liver protein from male WT or LKO mice (n = 3) 6 hours following injection of LPS (2 mg/kg) or vehicle (PBS). \*p<0.05 versus WT control levels. # p<0.05 versus WT + LPS levels. B) Targeting construct for creation of mouse allowing tissue-specific ablation of the alternative *Ppargc1a* promoter (AltProm<sup>FL/FL</sup>). C) mRNA of proximal and alternative *Pgc-1α* transcripts and D) western blot of proteins from primary mouse hepatocytes treated with 50 nM glucagon or vehicle. \*p<0.05 versus AltProm<sup>FL/FL</sup> Vehicle. #p<0.05 versus AltPromKO Vehicle. E) Western blot and F) fragmented nucleosomes from primary mouse hepatocytes treated with 20 ng/mL TNFα or vehicle for 6 hours. \*\*\*p<0.001 versus AltProm<sup>FL/FL</sup> Vehicle. Data are representative of at least 3 independent experiments.



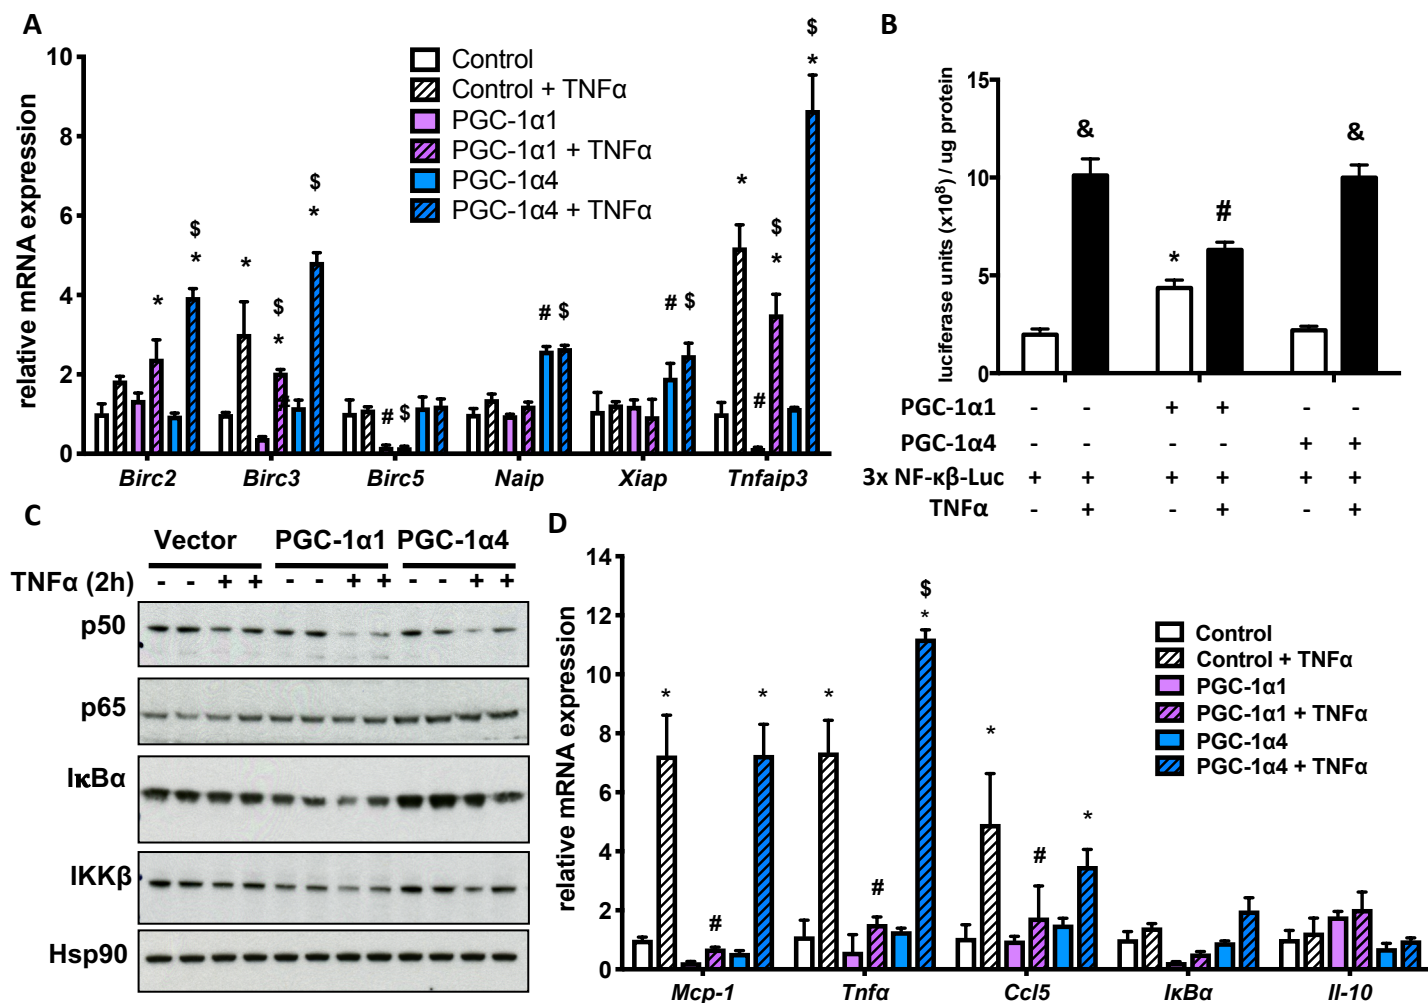

**Figure 6: PGC-1 $\alpha$ 4 potentiates anti-apoptotic gene expression independently of NF- $\kappa$ B transcriptional coactivation.** A) mRNA expression of primary mouse hepatocytes over-expressing PGC-1 $\alpha$ 1, PGC-1 $\alpha$ 4 or vector alone following 2-hr treatment with 2 ng/mL TNF $\alpha$  or vehicle (n=3). B) Luciferase activity in primary mouse hepatocytes treated with 2 ng/ml TNF $\alpha$  or vehicle 48 hours following transfection with a 3x NF- $\kappa$ B reporter and constructs for PGC-1 $\alpha$ 1 or PGC-1 $\alpha$ 4 (or vector alone, n=3). \*p<0.05 genotype effect compared to reporter vector, &p<0.05 TNF $\alpha$  response compared to vehicle, #p<0.05 TNF $\alpha$  response compared to vector + TNF $\alpha$ . C) Western blot and D) mRNA expression of primary mouse hepatocytes over-expressing PGC-1 $\alpha$ 1, PGC-1 $\alpha$ 4 or vector following 2-hr treatment with 2 ng/mL TNF $\alpha$  or vehicle (n=3). \*p<0.05 effect of TNF $\alpha$  within each genotype. #p<0.05 TNF $\alpha$  response compared to Control + TNF $\alpha$ . \$p<0.05 TNF $\alpha$  response compared to PGC-1 $\alpha$ 1 + TNF $\alpha$ . Data are representative of 2-3 independent experiments.

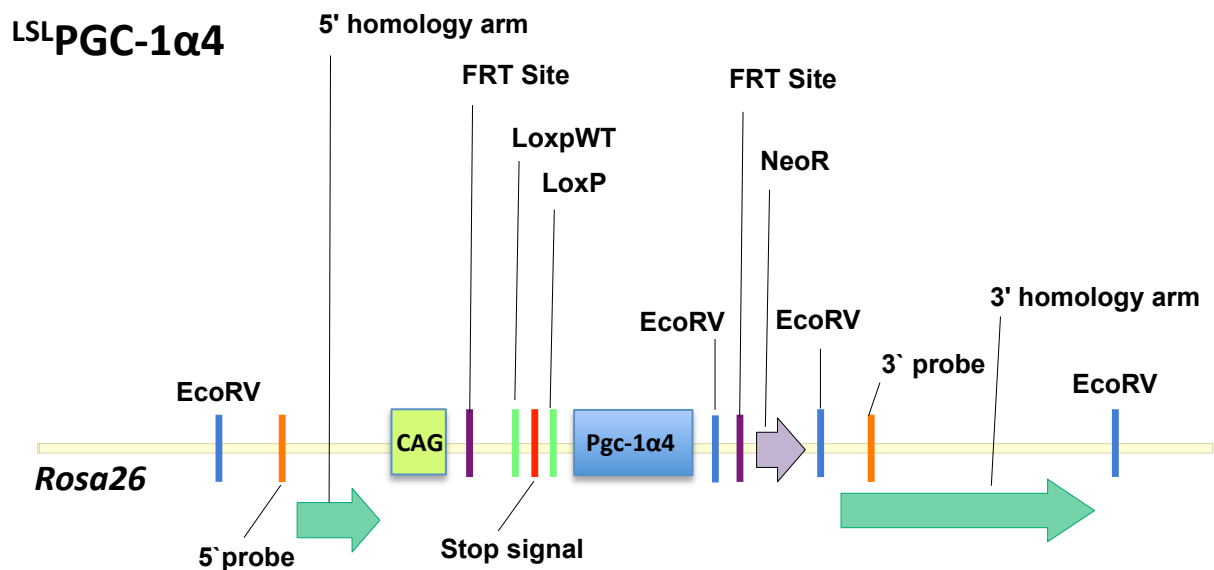

## AltPromKO

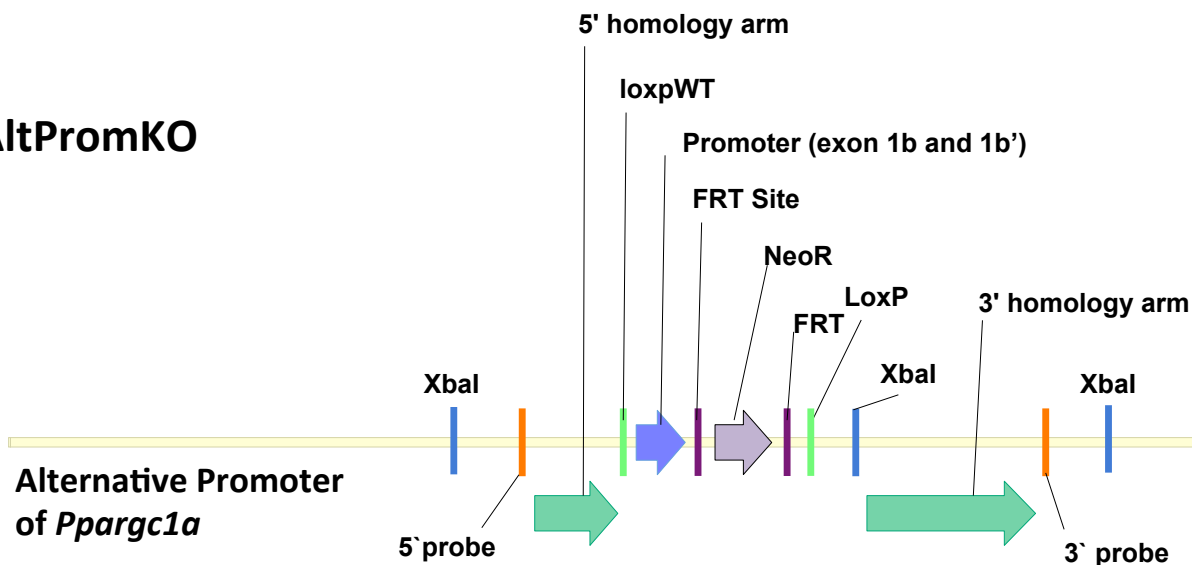

### Supplemental Figure S1: Targeting strategies for <sup>LSL</sup>PGC-1α4 and AltPromKO mouse lines.

Schematic of genomic locus for each mouse line, following recombination. Restriction sites (blue) and DNA probes (orange) used for Southern blot screening of ES clones are indicated. Complete diagrams of regulatory and cDNA elements inserted into genome can be found in Figures 4 and 5.

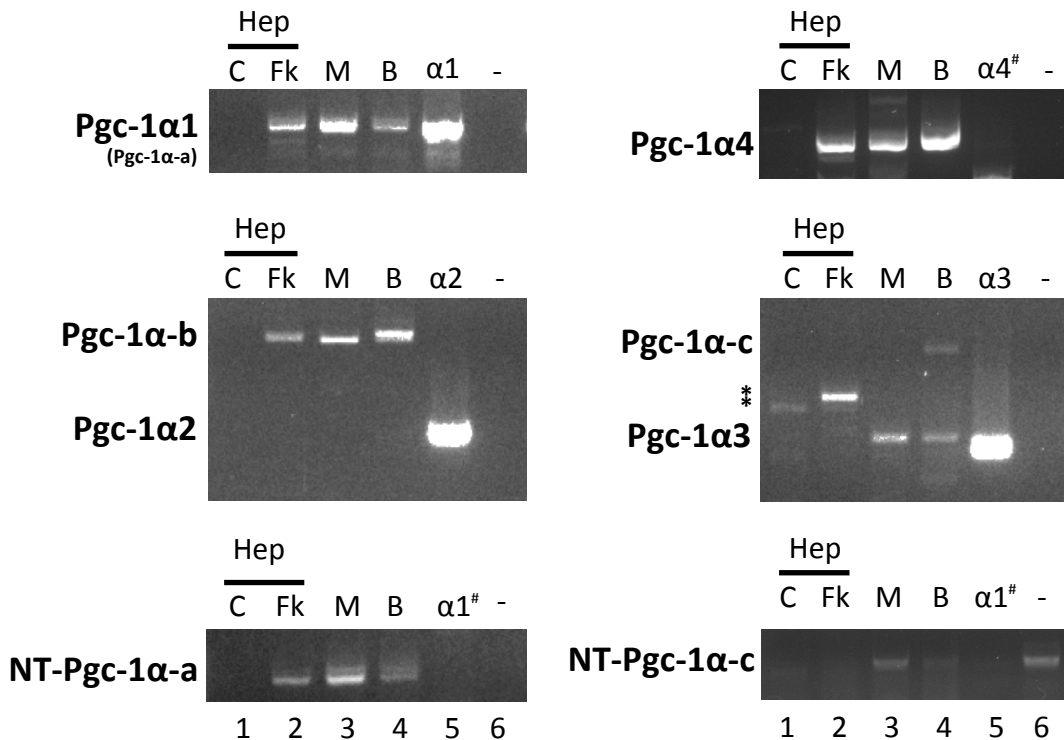

**Supplemental Figure S2: Expression levels of all known *Ppargc1a* transcripts in mouse tissues.**

Bands represent PCR products specific to each known PGC-1α isoform, amplified from cDNA. Lanes 1 and 2: Primary mouse hepatocytes treated with 10 nM forskolin or control vehicle (DMSO) for 3 hours. C – vehicle control, Fk – forskolin treated. Lane 3: Mouse muscle (M), Lane 4: Mouse brown adipose tissue (B). Lane 5: Primary mouse hepatocytes over-expressing the indicated PGC-1α isoform (positive and negative controls). Control vectors for some variants were not available, in this case, # represents control performed on cells over-expressing a structurally similar variant to demonstrate specificity and non-cross-reactivity of primer sets. Lane 6: Water control.

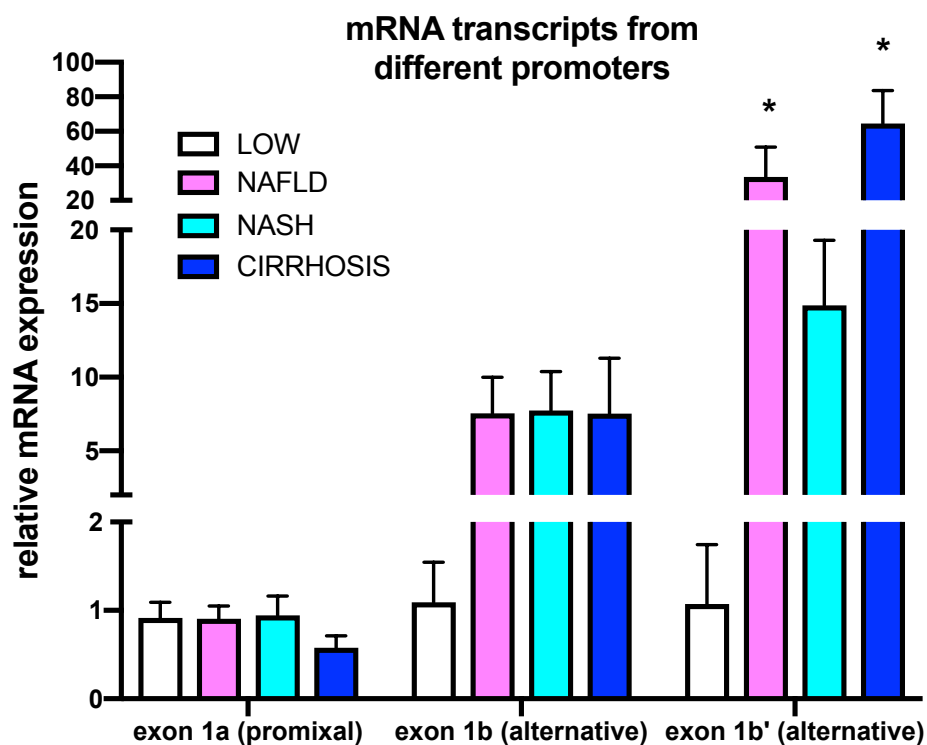

**Supplemental Figure S3: Expression of mRNA transcripts driven by proximal and alternative promoters of the *PPARGC1A* gene in human liver sample.** Quantification of mRNA transcripts amplified from human liver samples provided by the McGill Liver Disease Biobank. PCR products were specific for transcripts expressing either exon 1a of the proximal promoter, or exon 1b or exon 1b' of the alternative promoter. NAS values: LOW  $\leq 2$  (n=6), NAFLD = 3-5 (n=14), NASH = 6-9 (n=9), CIRRHOSIS = 7-9 + fibrosis (n = 8). \*p<0.05 compared to levels in human liver with low steatosis (LOW).

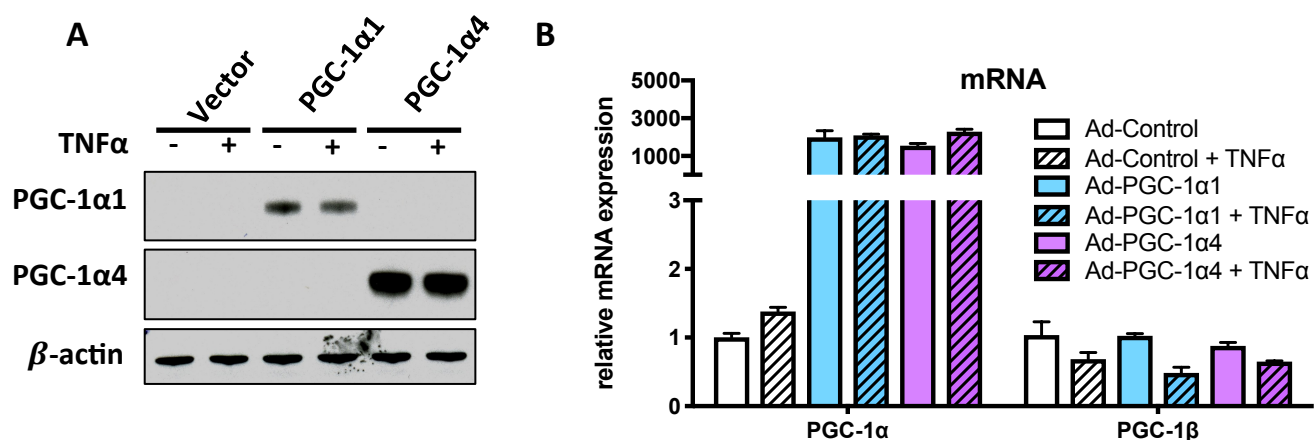

**Supplemental Figure S4: Relative levels of PGC-1 mRNA and protein following over-expression in primary mouse hepatocytes and TNF $\alpha$  treatment.** A) Western blot of proteins and B) relative mRNA levels in primary hepatocytes 48 hours following transduction with an adenovirus expressing cDNA for PGC-1 $\alpha$ 1, PGC-1 $\alpha$ 4 or vector alone (Ad-CMV-GFP). Prior to harvest, cells were treated for 2 hours with 20 ng/mL TNF $\alpha$  or vehicle alone (PBS).

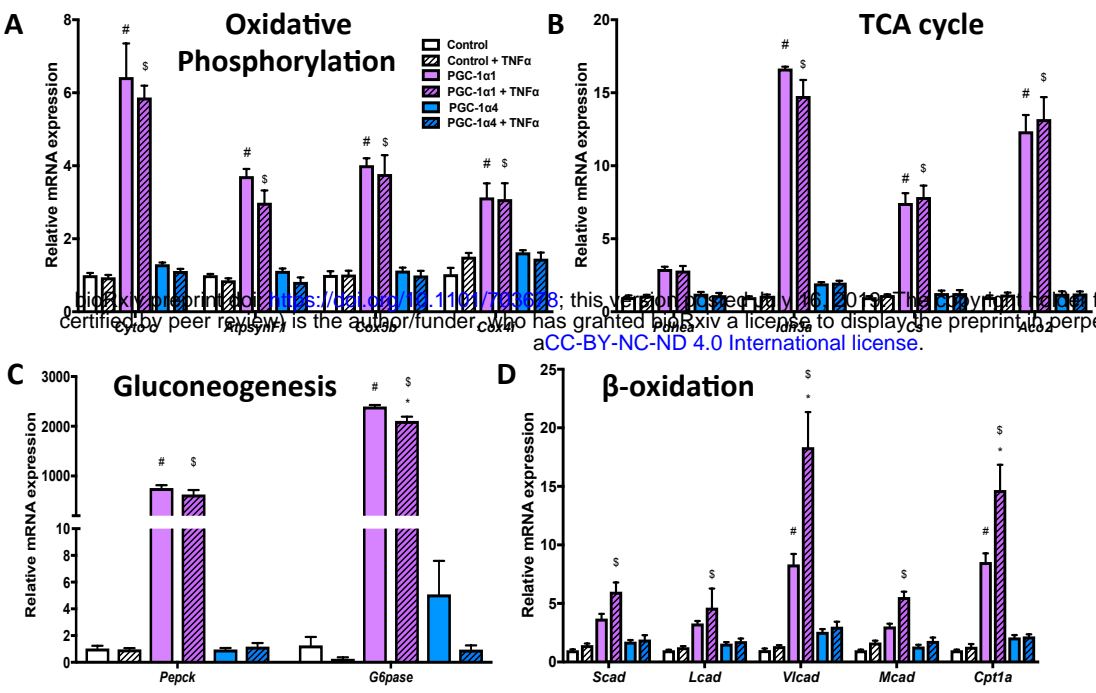

**Supplemental Figure S5: PGC-1α isoforms differentially regulate metabolic genes downstream of TNFα.** A-D) mRNA expression of primary mouse hepatocytes over-expressing PGC-1α1, PGC-1α4 or vector alone following 2-hr treatment with 2 ng/mL TNFα or vehicle (n=3). \*p<0.05 effect of TNFα within each genotype. #p<0.05 Effect of PGC-1α1 or PGC-1α4 expression compared to Control. \$p<0.05 TNFα response compared to Control + TNFα.

## DIRE analysis of regulated genes

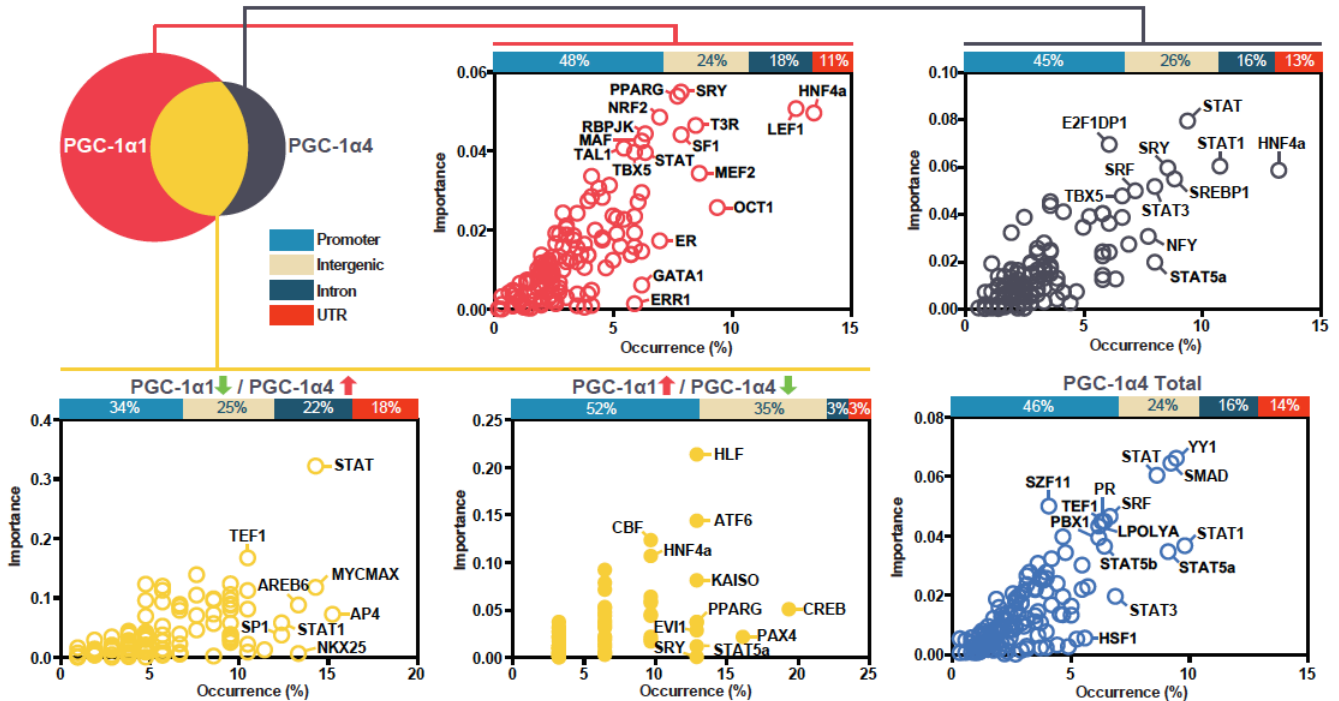

**Supplementary Figure S6: DiRE analysis of regulatory regions for enrichment of transcription factor binding sites.** Plotted are the occurrence of each binding motif and its importance metric, which reflects binding site specificity to the input gene set, compared to a background random set of 5000 genes. The top horizontal bars depict relative distribution of identified regulatory elements in promoters, intergenic, intronic, or untranslated regions.



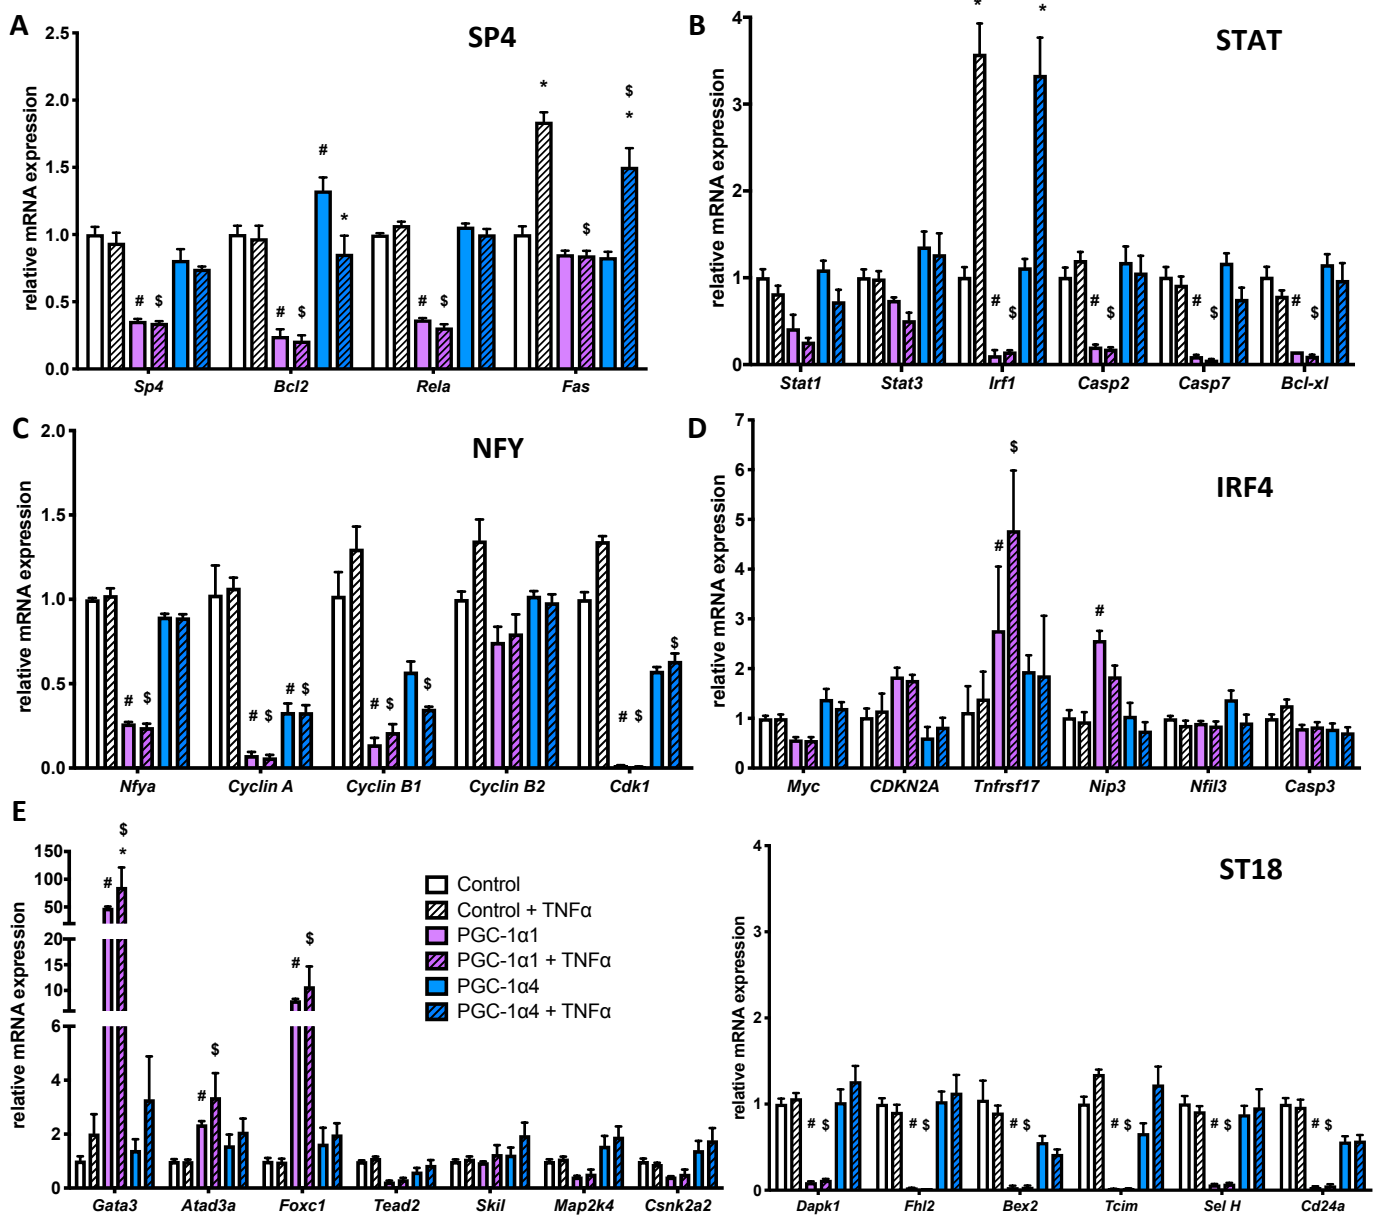

**Supplemental Figure S7: Target genes downstream of transcription factors identified by iRegulon and DiRE.** A-E) mRNA expression of primary mouse hepatocytes over-expressing PGC-1 $\alpha$ 1, PGC-1 $\alpha$ 4 or vector alone following 2-hr treatment with 2 ng/mL TNF $\alpha$  or vehicle (n=3). \*p<0.05 effect of TNF $\alpha$  within each genotype. #p<0.05 Effect of PGC-1 $\alpha$ 1 or PGC-1 $\alpha$ 4 expression compared to Control. \$p<0.05 TNF $\alpha$  response compared to Control + TNF $\alpha$ . Data are representative of at least 2 different experiments.

| <b>Supplemental Table S1: Primers used for conventional PCR (listed in 5' – 3' direction)</b> |                                                             |                                                                 |                                                     |
|-----------------------------------------------------------------------------------------------|-------------------------------------------------------------|-----------------------------------------------------------------|-----------------------------------------------------|
| Gene                                                                                          | Forward Primer                                              | Reverse Primer                                                  | Band size                                           |
| <b>Mouse Primers</b>                                                                          |                                                             |                                                                 |                                                     |
| <i>PGC-1α1</i>                                                                                | GACATGTGCAGCCAAGACTC                                        | CTCAAATGGGGAACCCCTTGG                                           | 816                                                 |
| <i>PGC-1α2</i> and <i>PGC-1α-b</i>                                                            | GATTGTCATCCATGGATTC                                         | GTTCGCTCAATAGTCTTGTTTC                                          | 325 / 826                                           |
| <i>PGC-1α3</i> and <i>PGC-1α-c</i>                                                            | CTCAGACCCACTATGCTGCTG                                       | GTTCGCTCAATAGTCTTGTTTC                                          | 302 / 818                                           |
| <i>PGC-1α4</i>                                                                                | GATTGTCATCCATGGATTC                                         | CTGGAAGATATGGCACAT                                              | 812                                                 |
| <i>NT-PGC-1α-a</i>                                                                            | GACATGTGCAGCCAAGACTC                                        | CTGGAAGATATGGCACAT                                              | 822                                                 |
| <i>NT-PGC-1α-c</i>                                                                            | CTCAGACCCACTATGCTGCTG                                       | CTGGAAGATATGGCACAT                                              | 803                                                 |
| <b>Genotyping primers</b>                                                                     |                                                             |                                                                 |                                                     |
| Alb-Cre <sup>Tg</sup>                                                                         | Forward (Albumin promoter)<br>TTAGAGGGGAACAGCTCCAGATGG      | Reverse (Cre-recombinase)<br>GTGAAACAGCATTGCTGTCACTT            |                                                     |
| LSLPGC-1α4                                                                                    | Forward ( <i>Ppargc1a</i> exon 6)<br>CCAAACCAACAACCTTTATCTC | Reverse 1 ( <i>Ppargc1a</i> intron 7)<br>CCTTCTGATAAAGAGTCAACGC | Reverse 2 ( <i>WPRE</i> )<br>GGAGAAAATGAAAGCCATACGG |
| <i>Ppargc1a</i> <sup>fl/fl</sup>                                                              | Forward ( <i>Ppargc1a</i> intron 2)<br>GGAGAGGTGTCAGGGAGAG  | Reverse ( <i>Ppargc1a</i> intron 2)<br>CACAGCAGAGCACAAAGGA      |                                                     |
| AltProm <sup>fl/fl</sup>                                                                      | Forward<br>AGAGTCAGCAGAACAAGCGT                             | Reverse<br>TGCTTTGCAGAGGTGCTCAT                                 |                                                     |

**Supplemental Table S2: Antibodies and Dilutions (Target, company, catalog number, dilution)**

| Target                     | Company           | Catalog Number | Dilution |
|----------------------------|-------------------|----------------|----------|
| PGC-1 $\alpha$             | Millipore         | ST1202         | 1:500    |
| V5                         | Thermo Scientific | MA5-15253      | 1:500    |
| Hsp90                      | Cell Signaling    | 4874           | 1:2000   |
| Cleaved Caspase 3 (Asp175) | Cell Signaling    | 9661           | 1:500    |
| NF $\kappa$ B p50/p150     | Abcam             | ab32360        | 1:500    |
| NF $\kappa$ B p65          | Abcam             | ab7970         | 1:500    |
| I $\kappa$ B $\alpha$      | Abcam             | ab32518        | 1:500    |
| IKK $\beta$                | Abcam             | ab32135        | 1:1000   |
| Lamin B1                   | BioVision         | 3807           | 1:200    |
| $\beta$ -actin             | Sigma             | A5441          | 1:5000   |

**Supplemental Table S3: Primers used for quantitative real-time PCR (listed in 5' – 3' direction)**

| Gene                         | Forward Primer                | Reverse Primer              |
|------------------------------|-------------------------------|-----------------------------|
| <b>Mouse Primers</b>         |                               |                             |
| <i>Birc2 (Ciap1)</i>         | TCTGCTGTGGCCTGATGTTGGATA      | ATGGAGACTGCAGACTGGCTGAAA    |
| <i>Birc3 (Ciap2)</i>         | AACTCCCTTCGGGAAATTGACCCT      | TTCTTTCCTCCT GGAGTTTCCGCA   |
| <i>Birc5 (survivin)</i>      | TGGACAGACAGAGAGCCAAGAACA      | AGCTGCTCAATTGACTGACGGGTA    |
| <i>Ccl5 (Rantes)</i>         | GCTGCTTTGCCTACCTCTCC          | TCGAGTGACAAACACGACTGC       |
| <i>IkBa (Nfkbia)</i>         | AGACATCCTTCCGCAAACCTC         | TAGGTCCTTCCTGCCCATAA        |
| <i>Il-10</i>                 | GCTCTTACTGACTGGCATGAG         | CGCAGCTCTAGGAGCATGTG        |
| <i>Mcp1 (Ccl2)</i>           | TCACCTGCTGCTACTCATTACCA       | TACAGCTTCTTTGGGACACCTGCT    |
| <i>Naip</i>                  | AGATGAAGAGCTCACCACCTGCTT      | AGTTCAGTCAGTCTCATGGCAGCA    |
| <i>Pgc-1α1/NT-PGC-1α-a</i>   | GGACATGTGCAGCCAAGACTCT        | CACTTCAATCCACCCAGAAAGCT     |
| <i>Pgc-1α4/NT-PGC-1α-a,c</i> | TCACACCAAACCCACAGAAA          | CTGGAAGATATGGCACAT          |
| <i>Tnfα</i>                  | CCCTCACACTCAGATCATCTTCT       | GCTACGACGTGGGCTACAG         |
| <i>Tnfαip3 (A20)</i>         | AGCCAGAAGAAGCTCAACTGGTGT      | TGCATGCATGAGGCAGTTTCCATC    |
| <i>Xiap</i>                  | CCAGCCATGGCAGAATATGA          | TCGCCCTCACCTAAAGCATAAA      |
| <i>Nfya</i>                  | CTCTGTGCCTGCTATCCAAA          | CCTCTTAAGGATGCGGTGATAC      |
| <i>Cyclin A</i>              | CACTGACACCTCTTGACTATCC        | CGTTCAGTGGCTTGTCTTCTA       |
| <i>Cyclin B1</i>             | GGTCGTGAAGTGACTGGAAA          | GTCTCCTGAAGCAGCCTAAAT       |
| <i>Cyclin B2</i>             | CTCTGCAAGATCGAGGACATAG        | TGCCTGAGGTACTGGTAGAT        |
| <i>Cdk1</i>                  | CAGACTTGAAAGCGAGGAAGA         | TCCTGCAGGCTGACTATATTTG      |
| <i>Cdc25c</i>                | TGCACAGTCAGAAGGAAGT           | GGAGGAGAATTACAGAGGAAC       |
| <i>Atad3a</i>                | GACAGGACAGCACAGTAGTAAG        | AGCAGACCATCTCGTCAATG        |
| <i>Pim1</i>                  | TTCAGGCAAACGGTCTCTTC          | CCACGGATGGTTCTGGATT         |
| <i>Csnk2a2</i>               | CACATAGACCTAGATCCACACTTC      | CAAGGTGCCTGTTCTCACTAT       |
| <i>Btg2</i>                  | CGCACTGACCGATCATTACAA         | GGGTCCATCTTGTGGTTGATAC      |
| <i>Myc</i>                   | CTC CGT ACA GCC CTA TTT CAT C | TGG GAA GCA GCT CGA ATT T   |
| <i>CDKN2A (p16)</i>          | CAT GTT GTT GAG GCT AGA GAG G | CAC CGT AGT TGA GCA GAA GAG |
| <i>Tnfrsf17</i>              | GCCTGGAGTATACAGTGGAAGA        | CGGGAAGAAATGGTCAGAAATCC     |
| <i>Nip3</i>                  | GACGAAGTAGCTCCAAGAGTTC        | CCAAAGCTGTGGCTGTCTAT        |
| <i>Nfil3</i>                 | GGTTTCCGAAGCTGAGAATTG         | AGATCGGTTGTGTGGCTATG        |
| <i>Casp3</i>                 | AGTGGGACTGATGAGGAGAT          | GTAACCAGGTGCTGTAGAGTAAG     |
| <i>Sp4</i>                   | TTTCTCAGCCAGCTTCTAGTTC        | GGGTGGAAGGATTACCTGATTT      |
| <i>Bcl2</i>                  | GGAGGATTGTGGCCTTCTTT          | GTTTCAGGTACTCAGTCATCCAC     |
| <i>RelA (p65)</i>            | GAGAAGCACAGATACCACCAAG        | GAGATTCTGAAGTGTTCCTGGTC     |
| <i>Fas</i>                   | CCAAGTGCAAGTGCAAACCAGACT      | AGGATGGTCAACAACCATAGGCGA    |
| <b>Human Primers</b>         |                               |                             |
| <i>HPRT</i>                  | GGCCAGACTTTGTTGGATTTG         | TGCGCTCATCTTAGGCTTTGT       |
| <i>Pgc-1α1/NT-PGC-1α-a</i>   | GGACATGTGCAACCAGGACT          | CACTTGAGTCCACCCAGAAAGCT     |
| <i>Pgc-1α4/NT-PGC-1α-a,c</i> | TCACACCAAACCCACAGA            | CTGGAAGATATGGCACAT          |

## Supplemental Table S4. Enriched Transcription Factor Motifs (iRegulon)

### Genes unique to PGC-1 $\alpha$ 1 (set of 2571 genes)

| TF    | NES   | #Targets | #Motifs/Tracks |
|-------|-------|----------|----------------|
| Etv6  | 3,93  | 1439     | 64             |
| Mef2c | 3,625 | 295      | 3              |
| Jun   | 3,554 | 299      | 7              |

### Genes unique to PGC-1 $\alpha$ 4 (set of 1208 genes)

| TF     | NES   | #Targets | #Motifs/Tracks |
|--------|-------|----------|----------------|
| Sp4    | 5,877 | 515      | 10             |
| Nfyc   | 5,151 | 206      | 9              |
| Nfya   | 4,96  | 295      | 13             |
| Irf6   | 4,333 | 453      | 6              |
| Gm7148 | 4,25  | 363      | 3              |
| Pitx2  | 4,014 | 330      | 4              |
| Irf4   | 3,951 | 118      | 2              |
| Hsf4   | 3,932 | 336      | 4              |
| Rela   | 3,588 | 93       | 4              |
| Atf4   | 3,48  | 136      | 3              |
| Srf    | 3,433 | 63       | 1              |
| Tbx5   | 3,233 | 88       | 1              |
| Ebf1   | 3,217 | 41       | 1              |

### Genes shared by PGC-1 $\alpha$ 1 and PGC-1 $\alpha$ 4 (set of 2166 genes)

| TF     | NES   | #Targets | #Motifs/Tracks |
|--------|-------|----------|----------------|
| Irf4   | 5,143 | 996      | 83             |
| Elk4   | 5,109 | 990      | 24             |
| Nr1h2  | 3,992 | 412      | 4              |
| Atf3   | 3,967 | 67       | 2              |
| Zbtb33 | 3,731 | 577      | 3              |
| Zfp143 | 3,52  | 239      | 2              |
| Pitx2  | 3,275 | 322      | 1              |
| Irf1   | 3,002 | 52       | 1              |

**Shared by PGC-1 $\alpha$ 1 and PGC-1 $\alpha$ 4, opposing regulation** (set of 175 genes)

| TF     | NES   | #Targets | #Motifs/Tracks |
|--------|-------|----------|----------------|
| Spib   | 5,472 | 40       | 4              |
| Nfatc2 | 4,794 | 30       | 3              |
| Klf4   | 4,716 | 23       | 7              |
| Srf    | 4,423 | 31       | 7              |
| Yeats4 | 4,131 | 15       | 2              |
| Mef2a  | 4,115 | 26       | 3              |
| Tead1  | 4,077 | 18       | 8              |
| Prkaa2 | 3,652 | 25       | 2              |
| Srebf2 | 3,331 | 15       | 3              |
| Jund   | 3,293 | 14       | 1              |
| Fezf2  | 3,223 | 7        | 1              |
